# Supplementary material for: Knowledge and attitudes among Lebanese pregnant women and women seeking fertility treatment during the COVID-19 outbreak: a cross-sectional survey
Source: PubMed Central journal article supplement — BMJ Open. 2022 Mar 16;12(3):e057873. doi: 10.1136/bmjopen-2021-057873 (PMC8927896; doi:10.1136/bmjopen-2021-057873), 2022-03-16
Supplement: bmjopen-2021-057873.draft_revisions.pdf [file bmjopen-2021-057873.draft_revisions.pdf]

# BMJ Open

BMJ Open is committed to open peer review. As part of this commitment we make the peer review history of every article we publish publicly available.

When an article is published we post the peer reviewers' comments and the authors' responses online. We also post the versions of the paper that were used during peer review. These are the versions that the peer review comments apply to.

The versions of the paper that follow are the versions that were submitted during the peer review process. They are not the versions of record or the final published versions. They should not be cited or distributed as the published version of this manuscript.

BMJ Open is an open access journal and the full, final, typeset and author-corrected version of record of the manuscript is available on our site with no access controls, subscription charges or pay-per-view fees (<http://bmjopen.bmj.com>).

If you have any questions on BMJ Open's open peer review process please email [info.bmjopen@bmj.com](mailto:info.bmjopen@bmj.com)

# BMJ Open

## Knowledge and attitudes among Lebanese pregnant women and women seeking fertility treatment during the COVID-19 outbreak: a cross sectional survey

|                               |                                                                                                                                                                                                                                                                                                                                                                             |
|-------------------------------|-----------------------------------------------------------------------------------------------------------------------------------------------------------------------------------------------------------------------------------------------------------------------------------------------------------------------------------------------------------------------------|
| Journal:                      | <i>BMJ Open</i>                                                                                                                                                                                                                                                                                                                                                             |
| Manuscript ID                 | bmjopen-2021-057873                                                                                                                                                                                                                                                                                                                                                         |
| Article Type:                 | Original research                                                                                                                                                                                                                                                                                                                                                           |
| Date Submitted by the Author: | 30-Sep-2021                                                                                                                                                                                                                                                                                                                                                                 |
| Complete List of Authors:     | El Taha, Lina; American University of Beirut Medical Center, Department of Obstetrics and Gynecology<br>Beyrouthy, Christine; American University of Beirut Medical Center, Department of Obstetrics and Gynecology<br>Tamim, Hani; American University of Beirut<br>Ghazeeri, Ghina; American University of Beirut Medical Center, Department of Obstetrics and Gynecology |
| Keywords:                     | COVID-19, Maternal medicine < OBSTETRICS, REPRODUCTIVE MEDICINE                                                                                                                                                                                                                                                                                                             |
|                               |                                                                                                                                                                                                                                                                                                                                                                             |

SCHOLARONE™  
Manuscripts

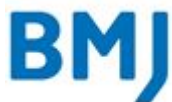

I, the Submitting Author has the right to grant and does grant on behalf of all authors of the Work (as defined in the below author licence), an exclusive licence and/or a non-exclusive licence for contributions from authors who are: i) UK Crown employees; ii) where BMJ has agreed a CC-BY licence shall apply, and/or iii) in accordance with the terms applicable for US Federal Government officers or employees acting as part of their official duties; on a worldwide, perpetual, irrevocable, royalty-free basis to BMJ Publishing Group Ltd ("BMJ") its licensees and where the relevant Journal is co-owned by BMJ to the co-owners of the Journal, to publish the Work in this journal and any other BMJ products and to exploit all rights, as set out in our [licence](#).

The Submitting Author accepts and understands that any supply made under these terms is made by BMJ to the Submitting Author unless you are acting as an employee on behalf of your employer or a postgraduate student of an affiliated institution which is paying any applicable article publishing charge ("APC") for Open Access articles. Where the Submitting Author wishes to make the Work available on an Open Access basis (and intends to pay the relevant APC), the terms of reuse of such Open Access shall be governed by a Creative Commons licence – details of these licences and which [Creative Commons](#) licence will apply to this Work are set out in our licence referred to above.

Other than as permitted in any relevant BMJ Author's Self Archiving Policies, I confirm this Work has not been accepted for publication elsewhere, is not being considered for publication elsewhere and does not duplicate material already published. I confirm all authors consent to publication of this Work and authorise the granting of this licence.

1  
2  
3  
4  
5  
6  
7  
8  
9

## **Knowledge and attitudes among Lebanese pregnant women and women seeking fertility treatment during the COVID-19 outbreak: a cross sectional survey**

Lina El Taha<sup>1,2</sup>, Christine Beyrouthy<sup>1</sup>, Hani Tamim<sup>1,3</sup>, Ghina Ghazeeri<sup>1,2\*</sup>

<sup>1</sup>Department of Obstetrics and Gynecology, American University of Beirut Medical Center, Beirut Lebanon

<sup>2</sup>Division of Reproductive Endocrinology and Infertility, American University of Beirut Medical Center, Beirut Lebanon

<sup>3</sup>Biostatistics Unit, Clinical Research Institute, American University of Beirut Medical Center, Beirut, Lebanon

15  
16  
17  
18  
19  
20  
21  
22  
23  
24  
25  
26  
27  
28  
29  
30  
31  
32  
33  
34  
35  
36  
37  
38  
39  
40  
41  
42  
43  
44  
45  
46  
47  
48  
49  
50  
51  
52  
53  
54  
55  
56  
57  
58  
59  
60

\*Corresponding author:

Associate Professor of Obstetrics and Gynecology

Mailing address:

Department of Obstetrics and Gynecology

American University of Beirut Medical Center

Riad El Solh, Beirut 1107 2020

Beirut - Lebanon

E-mail: [gg02@aub.edu.lb](mailto:gg02@aub.edu.lb)

Phone: 961-1350000, extension 5618

Fax: 961-1-370829

PO. BOX: 113-6044

## Abstract

**Objectives:** Coronavirus disease (COVID-19) has been recognized as a global health emergency necessitating collaborative efforts to halt further spread. Success of public health interventions and vaccination campaigns is contingent on the knowledge and awareness level of the public. We aim to assess COVID-19 knowledge and attitude among Lebanese pregnant women and women seeking fertility treatment.

**Design:** Cross sectional study utilizing telehealth administered survey.

**Setting:** University affiliated tertiary care center.

**Participants:** The data of 402-Lebanese women pregnant or seeking fertility treatment aged 20-45 years were analyzed.

**Outcome measures:** Extent of COVID-19 general knowledge, pregnancy-specific knowledge, and attitude toward COVID-19 practices.

**Results:** All participants reported being knowledgeable about COVID-19, 70 % of which rated their knowledge as 7 or more on a numerical scale of 0 to 10. The mean general COVID-19 knowledge was 22.15 (SD 2.44, range 14-27) indicating high level of knowledge. The mean pregnancy specific COVID-19 knowledge 6.84 (SD 2.061, range 0-10) indicating poorer pregnancy specific knowledge compared to general COVID-19 knowledge. A trend of higher knowledge was noted with higher income status. Reproductive age women with higher pregnancy specific knowledge had more positive attitudes toward COVID-19 pregnancy practices.

**Conclusion:** Our findings suggest a deficiency in pregnancy specific COVID-19 knowledge indicating the need for targeted public health education interventions. It highlight the need for enhancing COVID-19 pregnancy-specific awareness raising which can serve as a stepping-stone in the success of COVID-19 vaccination campaigns and halting further disease spread.

1  
2  
3 **Key words:** COVID-19; Lebanon; pregnancy; pandemic reaction; health; preventive measure; maternal  
4  
5 health  
6  
7

### 8 **Strengths and limitations of this study**

9

- 10 • First study to explore knowledge and attitude toward COVID-19 among the Lebanese population,  
11 particularly reproductive age women pregnant or seeking fertility treatments
  - 12 • Highlights the need for targeted public health education interventions and enhancing COVID-19  
13 pregnancy-specific awareness
  - 14 • The study's design was susceptible to reporting, desirability bias
  - 15 • Under-representation of women from rural areas and from lower educational attainments
- 16  
17  
18  
19  
20  
21  
22  
23  
24  
25

### 26 **Introduction**

27

28  
29 Human race has relentlessly suffered only to conquer innumerable epidemics throughout history. In  
30 December 2019, the story of yet another outbreak with the highly infectious new coronavirus disease  
31 began to unravel starting from Wuhan, China. While initial epidemiological investigations suspected  
32 zoonotic origins associating the outbreak to a Chinese seafood market, as the outbreak progressed,  
33 person-to-person dissemination became the main mode of transmission. In February 2020, the World  
34 health organization (WHO) designated this novel coronavirus disease COVID-19, short for coronavirus  
35 disease 2019.<sup>1</sup> Soon after, the WHO declared COVID-19 a pandemic on March 12<sup>th</sup>, 2020.<sup>2</sup> COVID-19  
36 became the emerging disease of the 21<sup>st</sup> century and a global health emergency of international concern  
37 demanding collaborative efforts to halt its further spread.<sup>3</sup>

38  
39  
40  
41  
42  
43  
44  
45  
46  
47  
48

49 The disease is caused by the severe acute respiratory syndrome coronavirus 2 (SARS-CoV-2). SARS-  
50 CoV-2 is a single stranded RNA virus belonging to the large family of coronavirus leading to spectrum of  
51 illness ranging from common cold to more morbid presentations such as the Severe Acute Respiratory  
52 Syndrome (SARS) and Middle East Respiratory Syndrome (MERS).<sup>4,5</sup> The most common symptoms of  
53  
54  
55  
56  
57  
58  
59  
60

1  
2  
3 COVID-19 include fever, cough, myalgias, fatigue, and shortness of breath.<sup>6,7</sup> As the scope of disease  
4 spread increased, more knowledge was gained via experience with COVID-19. Spread was initially  
5 believed to occur mainly via respiratory droplets. Viruses released in the respiratory secretions of an  
6 infected person while coughing, sneezing, or even talking have the potential of infecting others when in  
7 immediate contact with mucus membranes. Though droplets typically do not travel more than two meters,  
8 infection can still occur if contact is made with an infected surface questioning the time-frame  
9 sustainability of the virus through different media and on different surfaces.<sup>8</sup> Today, COVID-19 is known  
10 to have contact, droplet, and airborne transmission. The possibility of additional transmission routes could  
11 not however be overlooked especially considering finding of “coronavirus-like particles” by electron  
12 microscopy in stool samples reported in earlier studies which suggested additional fecal-oral viral  
13 transmission mode.<sup>9</sup> This was supported by detection of live virus cultured from stool of some COVID-19  
14 patients.<sup>10,11</sup> Yet, according to the joint WHO-China report, droplet transmission remains the main mode,  
15 whereby fecal-oral transmission did not appear to be a significant contributor in the spread of infection.<sup>12</sup>  
16 The detection of SARS-CoV-2 RNA in blood samples<sup>13</sup> implied additional major concerns regarding  
17 possibility of sexual transmission of the virus or even vertical transmission during pregnancy. These  
18 concerns were amplified by the dilemma imposed not only by who can transmit the novel corona virus  
19 but also for how long they can transmit it, the role of asymptomatic and pre-symptomatic viral shedding  
20 of infected individuals,<sup>14</sup> and the prognosed morbidity for infected individuals.

21  
22  
23  
24  
25  
26  
27  
28  
29  
30  
31  
32  
33  
34  
35  
36  
37  
38  
39  
40  
41  
42 As details on COVID-19 evolved, the devastating impact of its high transmission capability and  
43 associated morbidity and mortality became apparent particularly in vulnerable groups. In response,  
44 countries around the world including Lebanon, intensified their efforts to spread awareness and control  
45 the spread of this disease which has echoed fear in every human encounter and disrupted social harmony.  
46  
47  
48  
49  
50  
51  
52  
53  
54  
55  
56  
57  
58  
59  
60  
61  
62  
63  
64  
65  
66  
67  
68  
69  
70  
71  
72  
73  
74  
75  
76  
77  
78  
79  
80  
81  
82  
83  
84  
85  
86  
87  
88  
89  
90  
91  
92  
93  
94  
95  
96  
97  
98  
99  
100  
101  
102  
103  
104  
105  
106  
107  
108  
109  
110  
111  
112  
113  
114  
115  
116  
117  
118  
119  
120  
121  
122  
123  
124  
125  
126  
127  
128  
129  
130  
131  
132  
133  
134  
135  
136  
137  
138  
139  
140  
141  
142  
143  
144  
145  
146  
147  
148  
149  
150  
151  
152  
153  
154  
155  
156  
157  
158  
159  
160  
161  
162  
163  
164  
165  
166  
167  
168  
169  
170  
171  
172  
173  
174  
175  
176  
177  
178  
179  
180  
181  
182  
183  
184  
185  
186  
187  
188  
189  
190  
191  
192  
193  
194  
195  
196  
197  
198  
199  
200  
201  
202  
203  
204  
205  
206  
207  
208  
209  
210  
211  
212  
213  
214  
215  
216  
217  
218  
219  
220  
221  
222  
223  
224  
225  
226  
227  
228  
229  
230  
231  
232  
233  
234  
235  
236  
237  
238  
239  
240  
241  
242  
243  
244  
245  
246  
247  
248  
249  
250  
251  
252  
253  
254  
255  
256  
257  
258  
259  
260  
261  
262  
263  
264  
265  
266  
267  
268  
269  
270  
271  
272  
273  
274  
275  
276  
277  
278  
279  
280  
281  
282  
283  
284  
285  
286  
287  
288  
289  
290  
291  
292  
293  
294  
295  
296  
297  
298  
299  
300  
301  
302  
303  
304  
305  
306  
307  
308  
309  
310  
311  
312  
313  
314  
315  
316  
317  
318  
319  
320  
321  
322  
323  
324  
325  
326  
327  
328  
329  
330  
331  
332  
333  
334  
335  
336  
337  
338  
339  
340  
341  
342  
343  
344  
345  
346  
347  
348  
349  
350  
351  
352  
353  
354  
355  
356  
357  
358  
359  
360  
361  
362  
363  
364  
365  
366  
367  
368  
369  
370  
371  
372  
373  
374  
375  
376  
377  
378  
379  
380  
381  
382  
383  
384  
385  
386  
387  
388  
389  
390  
391  
392  
393  
394  
395  
396  
397  
398  
399  
400  
401  
402  
403  
404  
405  
406  
407  
408  
409  
410  
411  
412  
413  
414  
415  
416  
417  
418  
419  
420  
421  
422  
423  
424  
425  
426  
427  
428  
429  
430  
431  
432  
433  
434  
435  
436  
437  
438  
439  
440  
441  
442  
443  
444  
445  
446  
447  
448  
449  
450  
451  
452  
453  
454  
455  
456  
457  
458  
459  
460  
461  
462  
463  
464  
465  
466  
467  
468  
469  
470  
471  
472  
473  
474  
475  
476  
477  
478  
479  
480  
481  
482  
483  
484  
485  
486  
487  
488  
489  
490  
491  
492  
493  
494  
495  
496  
497  
498  
499  
500  
501  
502  
503  
504  
505  
506  
507  
508  
509  
510  
511  
512  
513  
514  
515  
516  
517  
518  
519  
520  
521  
522  
523  
524  
525  
526  
527  
528  
529  
530  
531  
532  
533  
534  
535  
536  
537  
538  
539  
540  
541  
542  
543  
544  
545  
546  
547  
548  
549  
550  
551  
552  
553  
554  
555  
556  
557  
558  
559  
560  
561  
562  
563  
564  
565  
566  
567  
568  
569  
570  
571  
572  
573  
574  
575  
576  
577  
578  
579  
580  
581  
582  
583  
584  
585  
586  
587  
588  
589  
590  
591  
592  
593  
594  
595  
596  
597  
598  
599  
600  
601  
602  
603  
604  
605  
606  
607  
608  
609  
610  
611  
612  
613  
614  
615  
616  
617  
618  
619  
620  
621  
622  
623  
624  
625  
626  
627  
628  
629  
630  
631  
632  
633  
634  
635  
636  
637  
638  
639  
640  
641  
642  
643  
644  
645  
646  
647  
648  
649  
650  
651  
652  
653  
654  
655  
656  
657  
658  
659  
660  
661  
662  
663  
664  
665  
666  
667  
668  
669  
670  
671  
672  
673  
674  
675  
676  
677  
678  
679  
680  
681  
682  
683  
684  
685  
686  
687  
688  
689  
690  
691  
692  
693  
694  
695  
696  
697  
698  
699  
700  
701  
702  
703  
704  
705  
706  
707  
708  
709  
710  
711  
712  
713  
714  
715  
716  
717  
718  
719  
720  
721  
722  
723  
724  
725  
726  
727  
728  
729  
730  
731  
732  
733  
734  
735  
736  
737  
738  
739  
740  
741  
742  
743  
744  
745  
746  
747  
748  
749  
750  
751  
752  
753  
754  
755  
756  
757  
758  
759  
760  
761  
762  
763  
764  
765  
766  
767  
768  
769  
770  
771  
772  
773  
774  
775  
776  
777  
778  
779  
780  
781  
782  
783  
784  
785  
786  
787  
788  
789  
790  
791  
792  
793  
794  
795  
796  
797  
798  
799  
800  
801  
802  
803  
804  
805  
806  
807  
808  
809  
810  
811  
812  
813  
814  
815  
816  
817  
818  
819  
820  
821  
822  
823  
824  
825  
826  
827  
828  
829  
830  
831  
832  
833  
834  
835  
836  
837  
838  
839  
840  
841  
842  
843  
844  
845  
846  
847  
848  
849  
850  
851  
852  
853  
854  
855  
856  
857  
858  
859  
860  
861  
862  
863  
864  
865  
866  
867  
868  
869  
870  
871  
872  
873  
874  
875  
876  
877  
878  
879  
880  
881  
882  
883  
884  
885  
886  
887  
888  
889  
890  
891  
892  
893  
894  
895  
896  
897  
898  
899  
900  
901  
902  
903  
904  
905  
906  
907  
908  
909  
910  
911  
912  
913  
914  
915  
916  
917  
918  
919  
920  
921  
922  
923  
924  
925  
926  
927  
928  
929  
930  
931  
932  
933  
934  
935  
936  
937  
938  
939  
940  
941  
942  
943  
944  
945  
946  
947  
948  
949  
950  
951  
952  
953  
954  
955  
956  
957  
958  
959  
960  
961  
962  
963  
964  
965  
966  
967  
968  
969  
970  
971  
972  
973  
974  
975  
976  
977  
978  
979  
980  
981  
982  
983  
984  
985  
986  
987  
988  
989  
990  
991  
992  
993  
994  
995  
996  
997  
998  
999  
1000

Various countries including China,<sup>15</sup> Kingdom of Saudi Arabia<sup>16</sup> and Egypt<sup>17</sup> have looked at their  
populations' knowledge and attitudes regarding COVID-19 to evaluate initiatives in raising awareness

1  
2  
3 and limiting disease spread. However, none evaluated COVID-19 knowledge among expectant mothers  
4  
5 where anxieties are intensified by potential maternal and fetal morbidities.  
6  
7

8 To the best of our knowledge, this is the first study to assess the knowledge and attitudes of Lebanese  
9  
10 pregnant women and women seeking fertility treatment regarding COVID-19 infection. This data is much  
11  
12 needed whereby success of public health interventions and vaccination campaigns is contingent of  
13  
14 knowledge and awareness level of the public. Findings may aid policy makers in the formulation of  
15  
16 recommendations tailored for this specific population, improve awareness to best tackle the COVID-19  
17  
18 pandemic and facilitate realization of vaccination campaigns.  
19  
20

## 21 **Materials and Methods**

### 22 **Study design and Population**

23  
24  
25 This cross-sectional study was conducted over two-month period, June and July 2020, at the American  
26  
27 University of Beirut Medical Center (AUBMC), a large tertiary care academic hospital well-recognized in  
28  
29 Lebanon and the Middle East. Lebanese women of reproductive age group, between 20 and 45 years of  
30  
31 age, followed at AUBMC Women's Health Center or Haifa Idriss Fertility unit for antenatal care or  
32  
33 seeking fertility treatment, were eligible for recruitment.  
34  
35  
36

37  
38 All participants were identified using the hospital's EPIC electronic Health Care System. Given the  
39  
40 widespread imposed quarantine, lockdown, and social distancing measures, eligible participants were  
41  
42 contacted, by our research assistant, over the phone in the listed order generated from EPIC until targeted  
43  
44 sample size was achieved. Our choice of recruitment method was to best accommodate the current  
45  
46 COVID-19 health situation while still obtaining a representative sample. Considering the noticeable  
47  
48 decline in number of patients physically presenting to clinics since the onset of COVID-19 pandemic,  
49  
50 administering our questionnaire in paper form would have introduced major selection bias to our collected  
51  
52 data, limited representativeness of our targeted population apart from violating recommended health care  
53  
54 measures designed to limit COVID-19 disease spread. Similarly, choosing an online survey format would  
55  
56  
57  
58  
59  
60



1  
2  
3 have failed to include women of low socioeconomic status and lower educational background who have  
4 limited online network access. The study was designed to maximize reach and amass the perspective of as  
5 many respondents as possible. As such, our study was devised utilizing telehealth to minimize in-person  
6 interactions embracing published American Society for Reproductive medicine (ASRM) Patient  
7 Management and Clinical Recommendations during the Coronavirus (COVID-19) Pandemic published  
8 on March17, 2020.  
9  
10  
11  
12  
13  
14  
15

### 16 **Study Tool and validation**

17  
18  
19 A questionnaire was developed for this current study to assess our target population's knowledge and  
20 attitude towards COVID-19. Items of the questionnaire were developed based on previous knowledge  
21 and attitudes questionnaires on ZIKA<sup>18</sup> and SARS virus<sup>19</sup> and according to guidelines published for the  
22 community on COVID-19 by the major scientific societies during the study period: Centers for Disease  
23 Control and Prevention (CDC),<sup>20</sup> ASRM,<sup>21</sup> European Society of Human Reproduction and Embryology  
24 (ESHRE),<sup>21</sup> and Royal College of Obstetrics and Gynecology (RCOG).<sup>22</sup>  
25  
26  
27  
28  
29  
30  
31

32 The questionnaire was divided into four main portions. The first section of the questionnaire gathered  
33 information on the woman's socio-demographic characteristics including age, area of residence,  
34 socioeconomic status/income level, educational attainment, parity, fertility status (pregnant with  
35 corresponding gestational age at the time of recruitment versus seeking fertility treatment for primary or  
36 secondary infertility). The second section included the respondent's self-rated perceived level of COVID-  
37 19 knowledge scored 0 (not knowledgeable) to 10 (extremely knowledgeable) and primary source of  
38 attained knowledge (social media/community including family and friends or governmental and scientific  
39 authorities). This section also assessed participant's knowledge of COVID-19 using 28 items on clinical  
40 symptoms, mode of transmission, diagnosis, control, and prevention. The third section consisted of 10-  
41 items assessing the participant's pregnancy specific COVID-19 knowledge (maternal morbidity, neonatal  
42 morbidity, delivery modes and breastfeeding). The fourth section assessed the participant's attitude  
43 towards COVID-19 infection during pregnancy using a five-point Likert scale. Whereby respondents  
44  
45  
46  
47  
48  
49  
50  
51  
52  
53  
54  
55  
56  
57  
58  
59  
60

1  
2  
3 were asked to state their level of agreement on each of six statements at “1 strongly disagree”, “2  
4 disagree”, “3 neutral/undecided”, “4 agree”, or “5 strongly agree”. Participants who answered 4 or 5 were  
5 categorized as agreeing for subsequent correlation of attitude with level of knowledge. Questions where  
6 higher scores indicated more negative attitude were flipped to preserve directionality across questions.  
7  
8  
9

10  
11  
12 The questionnaire was initially drafted in English then translated into Arabic and back to English by  
13 different authors to ensure the meaning of the content is comprehended. We then conducted a pre-  
14 liminary phase of testing our questionnaire for validity and reliability on a pilot of 15 participants who  
15 were excluded from the final analysis. The results showed adequate internal consistency reliability with a  
16 Cronbach alpha of 0.71.  
17  
18  
19  
20  
21

### 22 23 **Ethical approval:**

24  
25 This study was designed and coordinated in accordance with ethical principles regarding research  
26 involving human participants. Therefore, ethical approval of American University of Beirut Institutional  
27 Review Board (IRB) approval was secured prior to conducting the study including a waiver for written  
28 informed consent amended by oral/telephone consent. All participants’ responses were anonymous with  
29 no identifiable data collected.  
30  
31  
32  
33  
34  
35

### 36 37 **Patient and public involvement:**

38  
39 Patients and/or the public were not involved in the design, conduct, reporting or dissemination plans for  
40 this research.  
41  
42  
43

### 44 45 **Sampling**

46  
47 There are currently no registries in Lebanon estimating the number of reproductive age women whether  
48 pregnant or seeking fertility treatment. Also, in the absence of similar studies related to coronavirus  
49 disease in women of reproductive age group, our calculations of the sample size assumed that probability  
50 of good knowledge on COVID-19 is 50 %.<sup>23</sup> As such, a minimum of 384 participants are needed to have a  
51 representative sample. This is calculated using margin of error of 5% and an assumed probability of 0.5  
52  
53  
54  
55  
56  
57  
58  
59  
60

1  
2  
3 designed to obtain maximum sample size. Accordingly, recruitment was halted after a total of 402  
4  
5 respondents.  
6  
7

## 8 **Statistical Analysis**

9

10 Descriptive statistical analyses were performed to summarize data on socio-demographic factors. reported  
11  
12 for categorical variables as frequency (n) and percentage (%).  
13  
14

15 Two composite COVID-19 knowledge scores were calculated, a general and pregnancy specific COVID-  
16  
17 19 knowledge scores. The COVID-19 general knowledge score was calculated for each participant based  
18  
19 on 28 general COVID-19 knowledge items on the questionnaire. Similarly, pregnancy specific knowledge  
20  
21 score was calculated based on 10 items regarding COVID-19 infection during pregnancy. Knowledge  
22  
23 questions were given one point for each correct response and zero points to each incorrect response. The  
24  
25 median value for the cumulative general knowledge score and pregnancy specific knowledge score were  
26  
27 used as a cut-off to assess the difference in extent of knowledge (poor versus good knowledge) and  
28  
29 correlate it with sociodemographic characteristics, self-rated perception, and attitude using Pearson chi-  
30  
31 square test or Fisher's exact test. A participant's self-rated extent of knowledge was dichotomized to low  
32  
33 perception (values of 0 to 6 inclusive) versus high perception (values 7 to 10 inclusive) to facilitate  
34  
35 analysis.  
36  
37

38 All data analyses were performed using SPSS 26 statistical software package (IBM, USA). A P-value of  
39  
40 < 0.05 was considered statistically significant.  
41  
42

## 43 **Results**

44  
45  
46

47 A total of 402 women completed the questionnaire with an average of  $30.69 \pm 4.88$  years of age, 46% of  
48  
49 which lived in the capital Beirut. The socio-demographic characteristics of the participants are  
50  
51 summarized in table 1. Almost two-third of our sample were pregnant women with a comparable  
52  
53 representation for each trimester of pregnancy. The majority of the sample (91.8%) had a college degree  
54  
55 or higher educational attainment. The respondents were grouped according to their reported household's  
56  
57  
58  
59  
60

1  
2  
3 monthly income in dollars, converted from Lebanese pounds based on Lebanon's official exchange rate  
4 for uniformity in light of the Lebanon's economic crisis and the labile market exchange rates. Almost a  
5 third of the sample earned approximately the minimum monthly wage, a third had a monthly household  
6 income between 1000-2000\$, while remaining participants reported income above 2000\$.

7  
8  
9  
10  
11  
12 All participants reported being knowledgeable about COVID-19, 70 % of which rated their knowledge as  
13 7 or more on a numerical scale of 0 to 10, 0 representing no knowledge at all. General COVID-19  
14 knowledge score ranged between a minimum of 14 and maximum of 27, with an average score of 22.15  
15 (SD 2.44) and a median score of 22. Table 2 show responses to the general COVID-19 knowledge  
16 questions. The most frequently identified symptom of COVID-19 infection was fever (99.5%) followed  
17 by shortness of breath (96.5%) and cough (95%). Sputum production and rhinorrhea were erroneously  
18 missed as possible symptoms by 71.1% and 57.5% of the respondents. Majority of participants correctly  
19 identified COVID-19 mode of transmission, prevention and availability of approved treatment and  
20 vaccination at time of questionnaire administration. Remarkably, all participants deemed personal  
21 hygiene, social distancing and use of face mask as ideal measurements to limit disease spread reinforcing  
22 their knowledge of COVID-19 epidemiology.

23  
24  
25  
26  
27  
28  
29  
30  
31  
32  
33  
34  
35  
36  
37 Tables 3 and 4 summarize responses to pregnancy specific knowledge questions and attitude regarding  
38 management strategies of COVID-19 infection during pregnancy and post-partum. Pregnancy specific  
39 knowledge ranged from a minimum of zero to a maximum of 10 with an average score of 6.84 (SD 2.061)  
40 and a median score of 7. The percentage of correct responses on each of the pregnancy specific items of  
41 coronavirus disease in relation to pregnancy varied between 39.9% to 89.8%. About a third of the  
42 participants agreed that cesarean delivery should be performed to avoid vertical transmission of the virus  
43 and 40% to avoid exposure of health care workers to the virus. The majority showed positive attitudes to  
44 breastfeeding if there is no risk of viral transmission through breastmilk (78.3%) and negative attitude  
45 towards breastfeeding in light of possible respiratory transmission during lactation. 75.1% of women  
46 agreed on the importance of telehealth for follow up during COVID-19 pandemic. Remarkably, all  
47  
48  
49  
50  
51  
52  
53  
54  
55  
56  
57  
58  
59  
60

women agreed that they needed more information specifically on COVID-19 infection during pregnancy.

Although there was no significant difference in extent of general COVID-19 knowledge among pregnant women versus women seeking pregnancy, pregnant women had greater extent of knowledge regarding COVID-19 infection during pregnancy (Table 5). Extent of general and pregnancy specific COVID-19 knowledge was noted to be higher among women with higher reported monthly income. In addition, women with good pregnancy specific knowledge had significantly higher positive attitude towards measures related to COVID-19 infection during pregnancy and lactation (Table 6).

## Discussion

The novel coronavirus disease has become a global health emergency threatening not only health care systems but the political, economic, and social stability of countries globally. It is noteworthy that none of the respondents in our study reported total ignorance about COVID-19. All our sample conveyed being knowledgeable about COVID-19 with an average accuracy rate of general COVID knowledge about 79% ( $22/28 * 100$ ). These results are not surprising given the majority had high educational attainments. Moreover, this serves as attestation of the collaborative governmental and communal efforts to spread awareness and control the spread of the disease. Since the confirmation of first COVID-19 case in Lebanon on February 21, 2020, extraordinary measures have been put in action to control the spread of the disease. Campaigns were intensified to promote awareness on the transmission, symptoms, diagnosis, and prevention of this emerging illness whether through social media platforms, television ads, documentaries, brochures, or fliers posted in public. The ministry of health prudently monitored disease spread and updated their recommendations in accordance with WHO guidelines to deal with this outbreak. These measures included reinforcement of lockdown practices including suspension of internal and external flights, withholding gatherings, emphasizing online teaching in schools and universities, and abiding by strict nationwide curfews.

1  
2  
3 Available evidence stresses the importance of knowledge as a key element in tackling disease  
4 outbreaks.<sup>24,25</sup> Despite data from our sample indicative of high degree of COVID-19 general knowledge,  
5 the rise in number of COVID-19 cases in Lebanon<sup>26</sup> might deceptively undermine the power of this  
6 knowledge and efficiency of public health measures in dictating the public behavioral practices. Yet,  
7 special circumstances in Lebanon should be contemplated as contributory to the spread of COVID-19 in  
8 spite of the extent of general COVID-19 knowledge. Lebanon has been a crisis-stricken nation before the  
9 first confirmed COVID-19 case in the country. The economic crisis which preceded COVID-19 has led to  
10 massive business closures and drastic drop in Gross Domestic Product (GDP) with substantial increase in  
11 poverty.<sup>27,28</sup> This headed the premature uplifting of the lockdown measures with the subsequent increase  
12 in COVID-19 spread. Add to that the crowded refugee conditions with already deranged limited health  
13 capacity<sup>29</sup> and of course the capital's port blast which only added insult to injury.<sup>30,31</sup>

14  
15  
16  
17  
18  
19  
20  
21  
22  
23  
24  
25  
26  
27 General COVID-19 knowledge scores were more impressive in our population compared to the  
28 pregnancy specific COVID-19 knowledge. The least general knowledge score was 50% of correct  
29 responses compared to 0% least pregnancy specific knowledge score. This is also manifested in a lower  
30 pregnancy specific average and median knowledge score (table 3). Such findings are partly a reflection of  
31 role of information technology and the data made available during COVID-19 awareness campaigns.  
32  
33 While efforts focused on spreading awareness among the general population regarding COVID-19  
34 transmission, symptoms and preventive measures, governmental and public health measure had only  
35 modest emphasis on vulnerable populations particularly pregnant women and women desirous of  
36 conception. Therefore, we can fairly presume that accessibility to data on COVID-19 infection during  
37 pregnancy was mainly through scientific platforms. As such, restricting this peculiar knowledge mainly to  
38 women of higher educational background and socioeconomic status (table 5). Moreover, acquisition of  
39 such knowledge is tricky being highly contingent on regularly updated scientific resources. This is  
40 especially challenging given the uncertainty of the impact of COVID-19 during pregnancy with more data  
41 unrevealing with the spread of the disease.

1  
2  
3 Based on available evidence on COVID-19 infection during pregnancy and lactation, our data  
4 demonstrated more positive attitude among women with higher pregnancy specific knowledge. This  
5 essentially stresses the importance of spreading awareness and evidence-based knowledge adapted to the  
6 needs of the masses. This is particularly crucial as part of vaccine campaigns. Our data point the  
7 importance of tailoring platforms to educate reproductive age women on the essence and safety of  
8 available COVID-19 vaccines.  
9  
10  
11  
12  
13  
14

15  
16 To the researcher's knowledge this is the first study to explore knowledge and attitude toward COVID-19  
17 among the Lebanese population, particularly reproductive age women pregnant or seeking fertility  
18 treatments. One limitation of our study is that data used is self-reported with inherent reporting bias.  
19 Furthermore, identification of patients via the hospital's electronic health care system restricted the  
20 sampled population to women who have presented for care at least once during the COVID-19 pandemic  
21 which is limited by convenience during lockdown measures. This is essentially reflected by larger  
22 representation of women from Beirut Governorate, over 90% of which had a college degree or higher  
23 educational attainment, limiting generalizability of our results. However, the nature of this study in light  
24 of COVID-19 social constraints precludes acquisition of such data otherwise. Moreover, the value of our  
25 findings to promote COVID-19 awareness among reproductive age women pregnant and/or desirous of  
26 conception are expected to be amplified among women of lower socioeconomic status, educational  
27 background and/or from rural areas.  
28  
29  
30  
31  
32  
33  
34  
35  
36  
37  
38  
39  
40  
41  
42

### 43 **Conclusion**

44  
45  
46 This study suggests a deficiency in pregnancy specific COVID-19 knowledge indicating the need for  
47 targeted public health education interventions addressed to this vulnerable population. Though our data  
48 comes almost a year since the first documented COVID-19 case in Lebanon and does not address  
49 causation, however it aims through its findings to bridge deficiencies in public health interventions and  
50 promote awareness-raising among reproductive age women pregnant and/or desirous of conception which  
51  
52  
53  
54  
55  
56  
57  
58  
59  
60

1  
2  
3 might be instrumental to the success of COVID-19 vaccination and consequently eradication of covid-19  
4  
5 pandemic. The main conclusion of our paper is not new, yet a year has elapsed since the onset of the  
6  
7 COVID-19 pandemic and we are not yet corona-free. As such it stresses the importance of tailoring our  
8  
9 health education programs to promote knowledge needed to best overcome what we hope will one day  
10  
11 become a part of our history. If we want to reach a solution, the public knowledge including that of  
12  
13 vulnerable populations, attitudes and practices showed be in alignment. This is best accomplished by  
14  
15 raising awareness and being self-responsible.  
16  
17

#### 18 **Author's contributions:**

19  
20  
21 LE contributed to the main design of the study, development of research questions, analysis, data  
22  
23 interpretation, manuscript drafting and final amendments of the manuscript. CB contributed to  
24  
25 development of research questions, data collection and interpretation. HT contributed to study design,  
26  
27 data analysis and interpretation. GG was responsible for overseeing the full development of the study  
28  
29 design and data collection, data analysis and interpretation, development and final sign-off of the  
30  
31 manuscript. All authors reviewed and approved the final version of the manuscript.  
32  
33

#### 34 **Declaration of Competing Interests:**

35  
36 The authors declare that they have no conflict of interest.  
37  
38

#### 39 **Data availability statement:**

40  
41 Data are available upon reasonable request. Data may be made available by contacting the corresponding  
42  
43 author.  
44  
45

#### 46 **Ethical approval:**

47  
48 This study was reviewed and approved by institutional review board of the American University of  
49  
50 Beirut, Beirut, Lebanon (approval number SBS-2020-0167, approval date April,22,2020).  
51  
52  
53  
54  
55  
56  
57  
58  
59  
60



### Acknowledgements:

The authors would like to thank Dr. Fadi El-Jardali for his critical revision of this manuscript and Ms. Maha Makki for her input on data analysis.

**Funding:** This research did not receive any specific grant from funding agencies in the public, commercial, or not-for-profit sectors.

### References:

- 1- Organization WH. WHO Director-General's remarks at the media briefing on 2019-nCoV on 11 February 2020, 2020.
- 2- Organization WH. WHO Director-General's opening remarks at the media briefing on COVID-19-11 March 2020: Geneva, Switzerland, 2020.
- 3- Shigemura J, Ursano RJ, Morganstein JC, et al. Public responses to the novel 2019 coronavirus (2019-nCoV) in Japan: Mental health consequences and target populations. *Psychiatry and clinical neurosciences* 2020;74(4):281.
- 4- Gorbalenya AE, Baker SC, Baric R, et al. Severe acute respiratory syndrome-related coronavirus: The species and its viruses—a statement of the Coronavirus Study Group. 2020
- 5- Zhou P, Yang X-L, Wang X-G, et al. A pneumonia outbreak associated with a new coronavirus of probable bat origin. *nature* 2020;579(7798):270-73.
- 6- Borges do Nascimento IJ, Cacic N, Abdulazeem HM, et al. Novel coronavirus infection (COVID-19) in humans: a scoping review and meta-analysis. *Journal of clinical medicine* 2020;9(4):941.
- 7- Riou J, Althaus CL. Pattern of early human-to-human transmission of Wuhan 2019 novel coronavirus (2019-nCoV), December 2019 to January 2020. *Eurosurveillance* 2020;25(4):2000058.
- 8- Van Doremalen N, Bushmaker T, Morris DH, et al. Aerosol and surface stability of SARS-CoV-2 as compared with SARS-CoV-1. *New England journal of medicine* 2020;382(16):1564-67.

- 1  
2  
3 9- Gerna G, Passarani N, Battaglia M, et al. Human enteric coronaviruses: antigenic relatedness to  
4 human coronavirus OC43 and possible etiologic role in viral gastroenteritis. *Journal of Infectious*  
5 *Diseases* 1985;151(5):796-803.  
6  
7  
8  
9  
10 10- Tang A, Tong Z-d, Wang H-l, et al. Detection of novel coronavirus by RT-PCR in stool specimen  
11 from asymptomatic child, China. *Emerging infectious diseases* 2020;26(6):1337.  
12  
13  
14 11- Wang W, Xu Y, Gao R, et al. Detection of SARS-CoV-2 in different types of clinical specimens.  
15 *Jama* 2020;323(18):1843-44.  
16  
17  
18 12- Organization WH. Report of the WHO-China joint mission on coronavirus disease 2019  
19 (COVID-19). 2020  
20  
21  
22 13- Chen W, Lan Y, Yuan X, et al. Detectable 2019-nCoV viral RNA in blood is a strong indicator  
23 for the further clinical severity. *Emerging microbes & infections* 2020;9(1):469-73.  
24  
25  
26 14- Hoehl S, Rabenau H, Berger A, et al. Evidence of SARS-CoV-2 infection in returning travelers  
27 from Wuhan, China. *New England Journal of Medicine* 2020;382(13):1278-80.  
28  
29  
30 15- Huynh G, Nguyen TNH, Vo KN, et al. Knowledge and attitude toward COVID-19 among  
31 healthcare workers at District 2 Hospital, Ho Chi Minh City. *Asian Pacific Journal of Tropical*  
32 *Medicine* 2020;13(6):260.  
33  
34  
35 16- Al-Hanawi MK, Angawi K, Alshareef N, et al. Knowledge, attitude and practice toward COVID-  
36 19 among the public in the Kingdom of Saudi Arabia: a cross-sectional study. *Frontiers in public*  
37 *health* 2020;8:217.  
38  
39  
40 17- Abdelhafiz AS, Mohammed Z, Ibrahim ME, et al. Knowledge, perceptions, and attitude of  
41 Egyptians towards the novel coronavirus disease (COVID-19). *Journal of community health*  
42 2020;45(5):881-90.  
43  
44  
45 18- Harapan H, Rajamoorthy Y, Utomo PS, et al. Knowledge and attitude towards pregnancy-related  
46 issues of Zika virus infection among general practitioners in Indonesia. *BMC infectious diseases*  
47 2019;19(1):1-12.  
48  
49  
50  
51  
52  
53  
54  
55  
56  
57  
58  
59  
60

- 1  
2  
3 19- Bener A, Al-Khal A. Knowledge, attitude and practice towards SARS. *The journal of the Royal*  
4  
5 *Society for the Promotion of Health* 2004;124(4):167-70.  
6  
7 20- Garcia M, Lipskiy N, Tyson J, et al. Centers for Disease Control and Prevention 2019 novel  
8  
9 coronavirus disease (COVID-19) information management: addressing national health-care and  
10  
11 public health needs for standardized data definitions and codified vocabulary for data exchange.  
12  
13 *Journal of the American Medical Informatics Association* 2020;27(9):1476-87.  
14  
15 21- Rodriguez-Wallberg KA, Wikander I. A global recommendation for restrictive provision of  
16  
17 fertility treatments during the COVID-19 pandemic. *Acta obstetricia et gynecologica*  
18  
19 *Scandinavica* 2020;99(5):569.  
20  
21 22- Ortiz EI, Herrera E, De La Torre A. Coronavirus (COVID 19) infection in pregnancy. *Colombia*  
22  
23 *Médica* 2020;51(2)  
24  
25 23- Lemeshow S, Hosmer DW, Klar J, et al. Adequacy of sample size in health studies: Chichester:  
26  
27 Wiley 1990.  
28  
29 24- Goldstone BJ, Brown B. The role of public knowledge, resources, and innovation in responding  
30  
31 to the Ebola outbreak. *Disaster medicine and public health preparedness* 2015;9(5):595-97.  
32  
33 25- El-Jardali F, Bou-Karroum L, Fadlallah R. Amplifying the role of knowledge translation  
34  
35 platforms in the COVID-19 pandemic response. *Health Research Policy and Systems* 2020;18:1-  
36  
37 7.  
38  
39 26- Organization WH. Coronavirus disease ( COVID-19): weekly epidemiological update. 2020  
40  
41  
42 27- Bizri AR, Khachfe HH, Fares MY, et al. COVID-19 pandemic: an insult over injury for Lebanon.  
43  
44 *Journal of Community Health* 2021;46(3):487-93.  
45  
46 28- Khoury P, Azar E, Hitti E. COVID-19 response in Lebanon: current experience and challenges in  
47  
48 a low-resource setting. *Jama* 2020;324(6):548-49.  
49  
50 29- Diwan I, Abi-Rached JM. Lebanon: managing Covid-19 in the time of revolution. *Arab Reform*  
51  
52 2020  
53  
54  
55  
56  
57  
58  
59  
60

- 1  
2  
3 30- Abouzeid M, Habib RR, Jabbour S, et al. Lebanon's humanitarian crisis escalates after the Beirut  
4  
5 blast. *The Lancet* 2020;396(10260):1380-82.  
6  
7 31- El Sayed MJ. Beirut Ammonium Nitrate Explosion: A Man-Made Disaster in Times of the  
8  
9 COVID-19 Pandemic. *Disaster medicine and public health preparedness* 2020:1-5.  
10  
11  
12  
13  
14  
15  
16  
17  
18  
19  
20  
21  
22  
23  
24  
25  
26  
27  
28  
29  
30  
31  
32  
33  
34  
35  
36  
37  
38  
39  
40  
41  
42  
43  
44  
45  
46  
47  
48  
49  
50  
51  
52  
53  
54  
55  
56  
57  
58  
59  
60

**Table 1: Socio-demographic characteristics of participants**

| <b>Socio-demographic characteristic</b> | <b>Number of women</b> | <b>Percentage</b> |
|-----------------------------------------|------------------------|-------------------|
| Age, years                              |                        |                   |
| 20-30                                   | 210                    | 52.2              |
| 31-39                                   | 169                    | 42                |
| ≥40                                     | 23                     | 5.7               |
| Participant                             |                        |                   |
| Pregnant                                | 263                    | 65.4              |
| Seeking pregnancy                       | 139                    | 34.6              |
| Parity                                  |                        |                   |
| Nulliparous                             | 245                    | 60.9              |
| Parous                                  | 151                    | 37.6              |
| Trimester of Pregnancy                  |                        |                   |
| First trimester                         | 77                     | 29.3              |
| Second trimester                        | 89                     | 33.8              |
| Third trimester                         | 97                     | 36.9              |
| Education                               |                        |                   |
| High school or below                    | 31                     | 7.7               |
| College/university degree               | 222                    | 55.2              |
| Post-graduate degree                    | 147                    | 36.6              |
| Monthly income                          |                        |                   |
| Less than \$1000                        | 117                    | 29.1              |
| Between \$1000-\$2000                   | 130                    | 32.3              |
| Between \$2000-\$3000                   | 50                     | 12.4              |
| More than \$3000                        | 77                     | 19.2              |
| Primary source of knowledge             |                        |                   |
| Media/Social media/Internet             | 193                    | 48.0              |
| MoPH/WHO/CDC/Hospital                   | 194                    | 48.3              |

Table 2: Responses to general knowledge questions about COVID-19 among participants

| Knowledge items                                                                                    | Correct response<br>N (%) | Incorrect response<br>N (%) |
|----------------------------------------------------------------------------------------------------|---------------------------|-----------------------------|
| <b>Symptoms include</b>                                                                            |                           |                             |
| Fever                                                                                              | 400 (99.5)                | 2 (0.5)                     |
| Dry Cough                                                                                          | 382 (95)                  | 20 (5)                      |
| Wet cough/sputum production                                                                        | 112 (27.9)                | 286 (71.1)                  |
| Shortness of breath/difficulty breathing                                                           | 388 (96.5)                | 14 (3.5)                    |
| Fatigue                                                                                            | 356 (88.6)                | 46 (11.4)                   |
| Myalgia                                                                                            | 257 (63.9)                | 143 (35.6)                  |
| Rhinorrhea                                                                                         | 167 (41.5)                | 231 (57.5)                  |
| Sore throat                                                                                        | 298 (74.1)                | 102 (25.4)                  |
| Chest pain                                                                                         | 293 (72.9)                | 103 (25.6)                  |
| Loss of taste/decreased appetite                                                                   | 217 (54)                  | 179 (44.5)                  |
| Primary COVID-19 transmission mode is contact with infected surfaces                               | 112 (27.9)                | 284 (70.6)                  |
| Primary COVID-19 transmission mode is respiratory droplets                                         | 378 (94)                  | 21 (5.2)                    |
| All positive COVID-19 patients are symptomatic                                                     | 377 (93.8)                | 23 (5.7)                    |
| All COVID-19 patients have upper respiratory symptoms                                              | 323 (80.3)                | 76 (18.9)                   |
| COVID-19 is preventable                                                                            | 380 (94.5)                | 20(5)                       |
| COVID-19 is highly infectious                                                                      | 387 (96.3)                | 14 (3.5)                    |
| COVID-19 is less infectious/contagious than flu                                                    | 341 (84.8)                | 56 (13.9)                   |
| COVID-19 has high mortality than flu                                                               | 196 (48.8)                | 191 (47.5)                  |
| There is no need to repeat COVID-19 testing if negative in symptomatic patients                    | 340 (84.6)                | 58 (14.4)                   |
| COVID-19 infection spread can be reduced by education/spreading awareness                          | 402 (100)                 | 0                           |
| COVID-19 can spread by close person to person contact                                              | 399 (99.3)                | 3 (0.7)                     |
| COVID -19 can be cured                                                                             | 383 (95.3)                | 19 (4.7)                    |
| Approved treatment for COVID-19 is available                                                       | 389 (96.8)                | 12 (3)                      |
| Approved Vaccination against COVID-19 virus is available                                           | 397 (98.8)                | 1 (0.2)                     |
| Best approach to decrease viral spread is personal hygiene, social distancing and use of face mask | 402 (100)                 | 0                           |
| Incubation period/period between infection & onset of symptoms                                     | 341 (84.8)                | 61 (15.2)                   |
| Duration of viral shedding                                                                         | 117 (29.1)                | 266 (66.2)                  |
| Symptomatic patients with negative COVID-19 testing should self-quarantine for 14 days             | 370 (92)                  | 27 (6.7)                    |
| <b>General Knowledge score</b>                                                                     |                           |                             |
| Min-Max                                                                                            | 14-27                     |                             |
| Mean $\pm$ SD                                                                                      | 22.15 $\pm$ 2.44          |                             |
| Median- IQR                                                                                        | 22-3                      |                             |
| Poor general knowledge score                                                                       | 195 (48.5%)               |                             |
| Good general knowledge score                                                                       | 207 (51.5%)               |                             |

**Table 3: Responses to pregnancy specific knowledge questions about COVID-19 among participants**

| Knowledge items                                                                                                                 | Correct response<br>N (%) | Incorrect response<br>N (%) |
|---------------------------------------------------------------------------------------------------------------------------------|---------------------------|-----------------------------|
| Pregnant women have similar risk of being infected like non-pregnant women                                                      | 292 (72.6)                | 108 (26.9)                  |
| Pregnant COVID-19 positive women have increased maternal morbidity                                                              | 160 (39.8)                | 231 (57.5)                  |
| Coronavirus infected mothers are at higher risk of miscarriage                                                                  | 250 (62.2)                | 142 (35.3)                  |
| Coronavirus infected mothers are at higher risk of preterm delivery                                                             | 186 (46.3)                | 200 (49.8)                  |
| Pregnant women infected with COVID-19 late in pregnancy have been shown to transmit the virus to the fetus through the placenta | 303 (75.4)                | 82 (20.4)                   |
| Pregnant women infected with COVID-19 late in pregnancy have been shown to transmit the virus to the fetus during delivery      | 265 (65.9)                | 118 (29.4)                  |
| Only delivery mode for COVID-19 ladies is via cesarean delivery                                                                 | 256 (63.7)                | 131 (32.6)                  |
| Virus was shown to transmit through breastmilk                                                                                  | 324 (80.6)                | 62 (15.4)                   |
| COVID-19 infection during pregnancy was shown to cause congenital birth defects                                                 | 361 (89.8)                | 31 (7.7)                    |
| Maternal and neonatal risks of COVID-19 infection during pregnancy are not completely known                                     | 353 (87.8)                | 40 (10)                     |
| Pregnancy specific knowledge score                                                                                              |                           |                             |
| Min-Max                                                                                                                         | 0-10                      |                             |
| Mean $\pm$ SD                                                                                                                   | 6.84 $\pm$ 2.061          |                             |
| Median- IQR                                                                                                                     | 7-2                       |                             |
| Poor pregnancy specific knowledge score                                                                                         | 242 (60.2%)               |                             |
| Good pregnancy specific knowledge score                                                                                         | 160 (39.8%)               |                             |

**Table 4: Responses to attitude statements regarding pregnancy measures during COVID-19 pandemic**

|                                                                                                                                             | <b>Strongly disagree<br/>n(%)</b> | <b>Disagree<br/>n(%)</b> | <b>Neutral<br/>n(%)</b> | <b>Agree<br/>n(%)</b> |
|---------------------------------------------------------------------------------------------------------------------------------------------|-----------------------------------|--------------------------|-------------------------|-----------------------|
| do you think a pregnant woman with positive COVID-19 infection should undergo cesarean section to prevent fetal infection                   | 35 (8.7)                          | 152(37.8)                | 80 (19.9)               | 97 (24.1)             |
| do you think a pregnant woman with positive COVID-19 infection should undergo cesarean section to decrease health care workers to the virus | 28 (7)                            | 140 (34.8)               | 68 (16.9)               | 127 (31.6)            |
| do you think you need routine COVID-19 screening during pregnancy                                                                           | 35 (8.7)                          | 161 (40)                 | 51 (12.7)               | 112 (27.9)            |
| if you were told the virus does not spread to the infant                                                                                    | 13 (3.2)                          | 53 (13.2)                | 19 (4.7)                | 138 (34.3)            |
| if you were told the milk of an infected COVID-19 positive mother, would you breastfeed                                                     | 110 (27.4)                        | 139 (34.6)               | 30 (7.5)                | 82 (20.4)             |
| if you were told the virus can spread while breastfeeding                                                                                   | 7 (1.7)                           | 46 (11.4)                | 40 (10)                 | 169 (42)              |
| do you think respiratory droplets and contact with COVID-19 infected mother, would you breastfeed                                           |                                   |                          |                         |                       |
| do you think this is essential due to the current situation                                                                                 |                                   |                          |                         |                       |

**Table 5: Association between COVID-19 general knowledge score versus pregnancy specific COVID-19 knowledge and sociodemographic characteristics**

|  | <b>Knowledge score</b> |                     | <b>p-value</b> | <b>Pregnancy specific Knowledge score</b> |                       |  |
|--|------------------------|---------------------|----------------|-------------------------------------------|-----------------------|--|
|  | <b>Poor general</b>    | <b>Good general</b> |                | <b>Poor pregnancy</b>                     | <b>Good pregnancy</b> |  |
|  |                        |                     |                |                                           |                       |  |



|                                      | <b>COVID-19 knowledge<br/>N=195</b> | <b>COVID-19 knowledge<br/>N=207</b> |        | <b>specific COVID-19 knowledge<br/>N=242</b> | <b>specific COVID-19 knowledge<br/>N=160</b> | <b>p-value</b> |
|--------------------------------------|-------------------------------------|-------------------------------------|--------|----------------------------------------------|----------------------------------------------|----------------|
| <b>Age, years</b>                    |                                     |                                     |        |                                              |                                              |                |
| 20-30                                | 114 (55.1)                          | 96 (49.2)                           | 0.358  | 128 (52.9)                                   | 82 (51.3)                                    | 0.539          |
| 31-39                                | 80 (38.6)                           | 89 (45.6)                           |        | 98 (40.5)                                    | 71 (44.4)                                    |                |
| 40-45                                | 13 (6.3)                            | 10 (5.1)                            |        | 16 (6.6)                                     | 7 (4.4)                                      |                |
| <b>Gestational age</b>               |                                     |                                     |        |                                              |                                              |                |
| First trimester                      | 32 (24.8)                           | 45 (33.6)                           | 0.127  | 39 (27.3)                                    | 38 (31.7)                                    | 0.338          |
| Second trimester                     | 42 (32.6)                           | 47 (35.1)                           |        | 54 (37.8)                                    | 35 (29.2)                                    |                |
| Third trimester                      | 55 (42.6)                           | 42 (31.3)                           |        | 50 (35)                                      | 47 (39.2)                                    |                |
| <b>Parity</b>                        |                                     |                                     |        |                                              |                                              |                |
| Nulliparous                          | 129 (63.2)                          | 116 (60.4)                          | 0.564  | 154 (64.4)                                   | 91 (58)                                      | 0.195          |
| Parous                               | 75 (36.8)                           | 76 (39.6)                           |        | 85 (35.6)                                    | 66 (42)                                      |                |
| <b>Participant</b>                   |                                     |                                     |        |                                              |                                              |                |
| Pregnant                             | 130 (62.8)                          | 133 (68.2)                          | 0.255  | 144 (59.5)                                   | 119 (74.4)                                   | 0.002*         |
| Seeking pregnancy                    | 77 (37.2)                           | 62 (31.8)                           |        | 98 (40.5)                                    | 41 (25.6)                                    |                |
| <b>Education</b>                     |                                     |                                     |        |                                              |                                              |                |
| Primary/high school                  | 15 (7.3%)                           | 16 (8.2)                            | 0.887  | 23 (9.5)                                     | 8 (5)                                        | 0.026*         |
| College                              | 116 (56.6)                          | 106 (54.4)                          |        | 141 (58.5)                                   | 81 (50.9)                                    |                |
| Higher education                     | 74 (36.1)                           | 73 (37.4)                           |        | 77 (32)                                      | 70 (44)                                      |                |
| <b>Monthly income</b>                |                                     |                                     |        |                                              |                                              |                |
| Less than \$1000                     | 71 (36.2)                           | 46 (25.8)                           | 0.008* | 83 (36.6)                                    | 34 (23.1)                                    | 0.025*         |
| Between \$1000-2000                  | 70 (35.7)                           | 60 (33.7)                           |        | 72 (31.7)                                    | 58 (39.5)                                    |                |
| Between \$2000- 3000                 | 16 (8.2)                            | 34 (19.1)                           |        | 32 (14.1)                                    | 18 (12.2)                                    |                |
| More than \$3000                     | 39 (19.9)                           | 38 (21.3)                           |        | 40 (17.6)                                    | 37 (25.2)                                    |                |
| <b>Type of infertility</b>           |                                     |                                     |        |                                              |                                              |                |
| Primary                              | 49 (79)                             | 35 (76.1)                           | 0.716  | 56 (72.7)                                    | 28 (90.3)                                    | 0.047*         |
| Secondary                            | 13 (21)                             | 11 (23.9)                           |        | 21 (27.3)                                    | 3 (9.7)                                      |                |
| <b>Self-rated level of knowledge</b> |                                     |                                     |        |                                              |                                              |                |
| Low perception                       | 53 (26.1)                           | 60 (31.4)                           | 0.245  | 65 (27.7)                                    | 48 (30.2)                                    | 0.586          |
| High perception                      | 150 (73.9)                          | 131 (68.6)                          |        | 170 (72.3)                                   | 111 (69.8)                                   |                |
| <b>Source of knowledge</b>           |                                     |                                     |        |                                              |                                              |                |
| Community/Media                      | 106 (52.7)                          | 87 (46.8)                           | 0.241  | 115 (49.8)                                   | 78 (50)                                      | 0.967          |
| MoPH/WHO/CDC/<br>Hospital            | 95 (47.3)                           | 99 (53.2)                           |        | 116 (50.2)                                   | 78 (50)                                      |                |

Data presented as n (%).

\*Significant p-value<0.05

**Table 6: Association between pregnancy specific COVID-19 knowledge score and positive attitude towards COVID-19 dilemmas**

|  | <b>Pregnancy specific Knowledge score</b> |  |
|--|-------------------------------------------|--|
|--|-------------------------------------------|--|

|                                                                                                                                                                | <b>Poor pregnancy specific COVID-19 knowledge<br/>N=242</b> | <b>Good pregnancy specific COVID-19 knowledge<br/>N=160</b> | <b>p-value</b> |
|----------------------------------------------------------------------------------------------------------------------------------------------------------------|-------------------------------------------------------------|-------------------------------------------------------------|----------------|
| <b>Pregnant woman with positive COVID-19 infection should undergo cesarean section to prevent fetal intra-uterine infection</b>                                | 102 (42.1)                                                  | 31 (19.4)                                                   | <0.001*        |
| <b>Pregnant woman with positive COVID-19 infection should undergo cesarean section to decrease exposure of health care workers to the virus</b>                | 108 (45.2)                                                  | 55 (34.4)                                                   | 0.031*         |
| <b>Routine COVID-19 screening during pregnancy is needed</b>                                                                                                   | 100 (41.7)                                                  | 53 (33.1)                                                   | 0.085          |
| <b>If you were told the virus does not spread to the infant through breast milk of an infected COVID-19 positive mother, you would breastfeed</b>              | 178 (74.2)                                                  | 137 (85.6)                                                  | 0.006*         |
| <b>If you were told, the virus can spread while breastfeeding through respiratory droplets and contact with COVID-19 infected mother, you would breastfeed</b> | 67 (28.2)                                                   | 52 (32.5)                                                   | 0.353          |
| <b>Telehealth is essential due to the current situation</b>                                                                                                    | 100 (41.3)                                                  | 130 (81.3)                                                  | <0.001*        |

Data presented as n (%).

\*Significant p-value<0.05

STROBE Statement—Checklist of items that should be included in reports of *cross-sectional studies*

|                              | Item No | Recommendation                                                                                                                                                                                               | Page No   |
|------------------------------|---------|--------------------------------------------------------------------------------------------------------------------------------------------------------------------------------------------------------------|-----------|
| <b>Title and abstract</b>    | 1       | (a) Indicate the study's design with a commonly used term in the title or the abstract                                                                                                                       | 1,2       |
|                              |         | (b) Provide in the abstract an informative and balanced summary of what was done and what was found                                                                                                          | 2         |
| <b>Introduction</b>          |         |                                                                                                                                                                                                              |           |
| Background/rationale         | 2       | Explain the scientific background and rationale for the investigation being reported                                                                                                                         | 3,4       |
| Objectives                   | 3       | State specific objectives, including any prespecified hypotheses                                                                                                                                             | 5         |
| <b>Methods</b>               |         |                                                                                                                                                                                                              |           |
| Study design                 | 4       | Present key elements of study design early in the paper                                                                                                                                                      | 5         |
| Setting                      | 5       | Describe the setting, locations, and relevant dates, including periods of recruitment, exposure, follow-up, and data collection                                                                              | 5         |
| Participants                 | 6       | (a) Give the eligibility criteria, and the sources and methods of selection of participants                                                                                                                  | 5         |
| Variables                    | 7       | Clearly define all outcomes, exposures, predictors, potential confounders, and effect modifiers. Give diagnostic criteria, if applicable                                                                     | 6         |
| Data sources/<br>measurement | 8*      | For each variable of interest, give sources of data and details of methods of assessment (measurement). Describe comparability of assessment methods if there is more than one group                         | 6         |
| Bias                         | 9       | Describe any efforts to address potential sources of bias                                                                                                                                                    | 6         |
| Study size                   | 10      | Explain how the study size was arrived at                                                                                                                                                                    | 7         |
| Quantitative variables       | 11      | Explain how quantitative variables were handled in the analyses. If applicable, describe which groupings were chosen and why                                                                                 | 8         |
| Statistical methods          | 12      | (a) Describe all statistical methods, including those used to control for confounding                                                                                                                        | 8         |
|                              |         | (b) Describe any methods used to examine subgroups and interactions                                                                                                                                          | 8         |
|                              |         | (c) Explain how missing data were addressed                                                                                                                                                                  | 8         |
|                              |         | (d) If applicable, describe analytical methods taking account of sampling strategy                                                                                                                           | 8         |
|                              |         | (e) Describe any sensitivity analyses                                                                                                                                                                        | 8         |
| <b>Results</b>               |         |                                                                                                                                                                                                              |           |
| Participants                 | 13*     | (a) Report numbers of individuals at each stage of study—eg numbers potentially eligible, examined for eligibility, confirmed eligible, included in the study, completing follow-up, and analysed            | 8         |
|                              |         | (b) Give reasons for non-participation at each stage                                                                                                                                                         |           |
|                              |         | (c) Consider use of a flow diagram                                                                                                                                                                           |           |
| Descriptive data             | 14*     | (a) Give characteristics of study participants (eg demographic, clinical, social) and information on exposures and potential confounders                                                                     |           |
|                              |         | (b) Indicate number of participants with missing data for each variable of interest                                                                                                                          |           |
| Outcome data                 | 15*     | Report numbers of outcome events or summary measures                                                                                                                                                         | 9         |
| Main results                 | 16      | (a) Give unadjusted estimates and, if applicable, confounder-adjusted estimates and their precision (eg, 95% confidence interval). Make clear which confounders were adjusted for and why they were included | 9, tables |

|                          |    |                                                                                                                                                                            |       |
|--------------------------|----|----------------------------------------------------------------------------------------------------------------------------------------------------------------------------|-------|
|                          |    | (b) Report category boundaries when continuous variables were categorized                                                                                                  |       |
|                          |    | (c) If relevant, consider translating estimates of relative risk into absolute risk for a meaningful time period                                                           |       |
| Other analyses           | 17 | Report other analyses done—eg analyses of subgroups and interactions, and sensitivity analyses                                                                             |       |
| <b>Discussion</b>        |    |                                                                                                                                                                            |       |
| Key results              | 18 | Summarise key results with reference to study objectives                                                                                                                   | 10,11 |
| Limitations              | 19 | Discuss limitations of the study, taking into account sources of potential bias or imprecision. Discuss both direction and magnitude of any potential bias                 |       |
| Interpretation           | 20 | Give a cautious overall interpretation of results considering objectives, limitations, multiplicity of analyses, results from similar studies, and other relevant evidence | 12    |
| Generalisability         | 21 | Discuss the generalisability (external validity) of the study results                                                                                                      | 12    |
| <b>Other information</b> |    |                                                                                                                                                                            |       |
| Funding                  | 22 | Give the source of funding and the role of the funders for the present study and, if applicable, for the original study on which the present article is based              | NA    |

\*Give information separately for exposed and unexposed groups.

**Note:** An Explanation and Elaboration article discusses each checklist item and gives methodological background and published examples of transparent reporting. The STROBE checklist is best used in conjunction with this article (freely available on the Web sites of PLoS Medicine at <http://www.plosmedicine.org/>, Annals of Internal Medicine at <http://www.annals.org/>, and Epidemiology at <http://www.epidem.com/>). Information on the STROBE Initiative is available at [www.strobe-statement.org](http://www.strobe-statement.org).

# BMJ Open

## Knowledge and attitudes among Lebanese pregnant women and women seeking fertility treatment during the COVID-19 outbreak: a cross-sectional survey

|                                 |                                                                                                                                                                                                                                                                                                                                                                             |
|---------------------------------|-----------------------------------------------------------------------------------------------------------------------------------------------------------------------------------------------------------------------------------------------------------------------------------------------------------------------------------------------------------------------------|
| Journal:                        | <i>BMJ Open</i>                                                                                                                                                                                                                                                                                                                                                             |
| Manuscript ID                   | bmjopen-2021-057873.R1                                                                                                                                                                                                                                                                                                                                                      |
| Article Type:                   | Original research                                                                                                                                                                                                                                                                                                                                                           |
| Date Submitted by the Author:   | 31-Dec-2021                                                                                                                                                                                                                                                                                                                                                                 |
| Complete List of Authors:       | El Taha, Lina; American University of Beirut Medical Center, Department of Obstetrics and Gynecology<br>Beyrouthy, Christine; American University of Beirut Medical Center, Department of Obstetrics and Gynecology<br>Tamim, Hani; American University of Beirut<br>Ghazeeri, Ghina; American University of Beirut Medical Center, Department of Obstetrics and Gynecology |
| <b>Primary Subject Heading</b>: | Public health                                                                                                                                                                                                                                                                                                                                                               |
| Secondary Subject Heading:      | Health policy, Obstetrics and gynaecology                                                                                                                                                                                                                                                                                                                                   |
| Keywords:                       | COVID-19, Maternal medicine < OBSTETRICS, REPRODUCTIVE MEDICINE                                                                                                                                                                                                                                                                                                             |
|                                 |                                                                                                                                                                                                                                                                                                                                                                             |

SCHOLARONE™  
Manuscripts

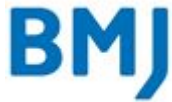

I, the Submitting Author has the right to grant and does grant on behalf of all authors of the Work (as defined in the below author licence), an exclusive licence and/or a non-exclusive licence for contributions from authors who are: i) UK Crown employees; ii) where BMJ has agreed a CC-BY licence shall apply, and/or iii) in accordance with the terms applicable for US Federal Government officers or employees acting as part of their official duties; on a worldwide, perpetual, irrevocable, royalty-free basis to BMJ Publishing Group Ltd ("BMJ") its licensees and where the relevant Journal is co-owned by BMJ to the co-owners of the Journal, to publish the Work in this journal and any other BMJ products and to exploit all rights, as set out in our [licence](#).

The Submitting Author accepts and understands that any supply made under these terms is made by BMJ to the Submitting Author unless you are acting as an employee on behalf of your employer or a postgraduate student of an affiliated institution which is paying any applicable article publishing charge ("APC") for Open Access articles. Where the Submitting Author wishes to make the Work available on an Open Access basis (and intends to pay the relevant APC), the terms of reuse of such Open Access shall be governed by a Creative Commons licence – details of these licences and which [Creative Commons](#) licence will apply to this Work are set out in our licence referred to above.

Other than as permitted in any relevant BMJ Author's Self Archiving Policies, I confirm this Work has not been accepted for publication elsewhere, is not being considered for publication elsewhere and does not duplicate material already published. I confirm all authors consent to publication of this Work and authorise the granting of this licence.

1  
2  
3  
4  
5  
6  
7  
8  
9

## **Knowledge and attitudes among Lebanese pregnant women and women seeking fertility treatment during the COVID-19 outbreak: a cross-sectional survey**

10  
11  
12  
13  
14  
15

**Lina ElTaha<sup>1,2</sup>, Christine Beyrouthy<sup>1</sup>, Hani Tamim<sup>1,3</sup>, Ghina Ghazeeri<sup>1,2\*</sup>**

16  
17  
18  
19  
20  
21  
22  
23  
24  
25  
26  
27  
28  
29  
30  
31  
32  
33  
34  
35  
36  
37  
38  
39  
40  
41  
42  
43  
44  
45  
46  
47  
48  
49  
50  
51  
52  
53  
54  
55  
56  
57  
58  
59  
60

<sup>1</sup>Department of Obstetrics and Gynecology, American University of Beirut Medical Center, Beirut Lebanon

<sup>2</sup>Division of Reproductive Endocrinology and Infertility, American University of Beirut Medical Center, Beirut Lebanon

<sup>3</sup>Biostatistics Unit, Clinical Research Institute, American University of Beirut Medical Center, Beirut, Lebanon

\*Corresponding author:

Associate Professor of Obstetrics and Gynecology

Mailing address:

Department of Obstetrics and Gynecology

American University of Beirut Medical Center

Riad El Solh, Beirut 1107 2020

Beirut - Lebanon

E-mail: [gg02@aub.edu.lb](mailto:gg02@aub.edu.lb)

Phone: 961-1350000, extension 5618

Fax: 961-1-370829

PO. BOX: 113-6044

## Abstract

**Objectives:** Coronavirus disease (COVID-19) has been recognized as a global health emergency necessitating collaborative efforts to halt further disease spread. The success of public health interventions and vaccination campaigns is contingent on the knowledge and awareness level of the public. We aim to assess COVID-19 knowledge and attitudes among Lebanese pregnant women and women seeking fertility treatment.

**Design:** Cross-sectional study utilizing telehealth administered survey.

**Setting:** University-affiliated tertiary care center.

**Participants:** The data of 402-Lebanese women pregnant or seeking fertility treatment aged 20-45 years were analyzed.

**Outcome measures:** Extent of COVID-19 general knowledge, pregnancy-specific knowledge, and attitudes toward COVID-19 practices.

**Results:** All participants reported being knowledgeable about COVID-19, 70 % of which rated their knowledge as 7 or more on a numerical scale of 0 to 10. The mean general COVID-19 knowledge was 22.15 (SD 2.44, range 14-27) indicating a high level of knowledge. The mean pregnancy-specific COVID-19 knowledge 6.84 (SD 2.061, range 0-10) indicated poorer pregnancy-specific knowledge compared to general COVID-19 knowledge. A trend towards higher knowledge was noted with higher income status. Reproductive age women with higher pregnancy-specific knowledge had more positive attitudes toward COVID-19 pregnancy practices.

**Conclusion:** Our findings suggest a deficiency in pregnancy-specific COVID-19 knowledge stressing the necessity for targeted public health education interventions. It highlights the need for enhancing COVID-19 pregnancy-specific awareness which can serve as a stepping-stone in the success of COVID-19 vaccination campaigns and in halting further disease spread.



1  
2  
3 **Keywords:** COVID-19; Health; Lebanon; Maternal health; Pandemic reaction; Pregnancy; Preventive  
4  
5 measures  
6  
7

### 8 **Strengths and limitations of this study**

9

- 10 • First study to explore knowledge and attitudes toward COVID-19 among reproductive age  
11 women pregnant or seeking fertility treatments.
  - 12 • The survey responses may have been susceptible to reporting bias, in the form of participant self-  
13 reporting and social-desirability bias.
  - 14 • Cross-sectional study design precludes establishing a causal association.
  - 15 • Under-representation of women from rural areas and lower educational attainments.
  - 16 • Knowledge and attitudes toward COVID-9 are provisional and may change over time.
- 17  
18  
19  
20  
21  
22  
23  
24  
25  
26  
27  
28  
29  
30  
31

### 32 **Introduction**

33

34  
35 Throughout history, the human race has fought and conquered innumerable epidemics. In December  
36 2019, the story of yet another outbreak with the highly infectious new coronavirus disease began to  
37 unravel starting from Wuhan, China. While initial epidemiological investigations suspected zoonotic  
38 origins associating the outbreak to a Chinese seafood market, as the outbreak progressed, person-to-  
39 person dissemination became the main mode of transmission. In February 2020, the World health  
40 organization (WHO) designated this novel coronavirus disease COVID-19, short for coronavirus disease  
41 2019.<sup>1</sup> Soon after, the WHO declared COVID-19 a pandemic on March 12<sup>th</sup>,2020.<sup>2</sup> COVID-19 became  
42 the emerging disease of the 21<sup>st</sup> century and a global health emergency of international concern  
43 demanding collaborative efforts to halt its further spread.<sup>3</sup>  
44  
45  
46  
47  
48  
49  
50  
51  
52  
53  
54  
55  
56  
57  
58  
59  
60

1  
2  
3 The disease is caused by the severe acute respiratory syndrome coronavirus 2 (SARS-CoV-2). SARS-  
4  
5 CoV-2 is a single-stranded RNA virus belonging to the large family of coronavirus leading to a spectrum  
6  
7 of illnesses ranging from the common cold to more morbid presentations such as the Severe Acute  
8  
9 Respiratory Syndrome (SARS) and Middle East Respiratory Syndrome (MERS).<sup>4,5</sup> The most common  
10  
11 symptoms of COVID-19 include fever, cough, myalgias, fatigue, and shortness of breath.<sup>6,7</sup> As the scope  
12  
13 of disease spread increased, more knowledge was gained via experience with COVID-19. Spread was  
14  
15 initially believed to occur mainly via respiratory droplets. Viruses released in the respiratory secretions of  
16  
17 an infected person while coughing, sneezing, or even talking have the potential of infecting others when  
18  
19 in immediate contact with mucous membranes. Though droplets typically do not travel more than two  
20  
21 meters, infection can still occur if contact is made with an infected surface questioning the time-frame  
22  
23 sustainability of the virus through different media and on different surfaces.<sup>8</sup> Today, COVID-19 is known  
24  
25 to have contact, droplet, and airborne transmission. The possibility of additional transmission routes could  
26  
27 not however be overlooked especially considering the detection of “coronavirus-like particles” by  
28  
29 electron microscopy in stool samples reported in earlier studies which suggested additional fecal-oral  
30  
31 viral transmission mode.<sup>9</sup> This was supported by the detection of live virus cultured from stool of some  
32  
33 COVID-19 patients.<sup>10,11</sup> Yet, according to the joint WHO-China report, droplet transmission remains the  
34  
35 main mode, whereby fecal-oral transmission did not appear to be a significant contributor to the spread of  
36  
37 infection.<sup>12</sup> The detection of SARS-CoV-2 RNA in blood samples<sup>13</sup> implied additional major concerns  
38  
39 regarding the possibility of sexual transmission of the virus or even vertical transmission during  
40  
41 pregnancy. These concerns were amplified by the dilemma imposed not only by who can transmit the  
42  
43 novel coronavirus but also for how long they can transmit it, the role of asymptomatic and pre-  
44  
45 symptomatic viral shedding of infected individuals,<sup>14</sup> and the prognosed morbidity for infected  
46  
47 individuals.  
48  
49  
50

51  
52 As details on COVID-19 evolved, the devastating impact of its high transmission capability and  
53  
54 associated morbidity and mortality became apparent, particularly in vulnerable groups. In response,  
55  
56  
57  
58  
59

1  
2  
3 countries around the world including Lebanon intensified their efforts to spread awareness and control the  
4 spread of this disease which has disrupted social harmony. Various countries including China,<sup>15</sup> Kingdom  
5 of Saudi Arabia<sup>16</sup> and Egypt<sup>17</sup> have looked at their populations' knowledge and attitudes regarding  
6 COVID-19 to evaluate initiatives in raising awareness and limiting disease spread. However, none  
7 evaluated COVID-19 knowledge among expectant mothers where anxieties are intensified by potential  
8 maternal and fetal morbidities.  
9

10  
11 To the best of our knowledge, this is the first study to assess the knowledge and attitudes of Lebanese  
12 pregnant women and women seeking fertility treatment regarding COVID-19 infection. This data is much  
13 needed whereby the success of public health interventions and vaccination campaigns are contingent on  
14 the knowledge and awareness level of the public. Findings may aid policymakers in the formulation of  
15 recommendations tailored for this specific population, improve awareness to best tackle the COVID-19  
16 pandemic, and facilitate the realization of vaccination campaigns.  
17  
18  
19  
20  
21  
22  
23  
24  
25  
26  
27  
28  
29

## 30 **Materials and Methods**

### 31 **Study Design and Population**

32  
33  
34  
35  
36 This cross-sectional study was conducted over a two-month period, June and July 2020, at the American  
37 University of Beirut Medical Center (AUBMC), a large tertiary care academic hospital well-recognized in  
38 Lebanon and the Middle East. Lebanese women of reproductive age group, between 20 and 45 years of  
39 age, followed at AUBMC Women's Health Center or Haifa Idriss Fertility unit for antenatal care or  
40 seeking fertility treatment, were eligible for recruitment.  
41  
42  
43  
44  
45  
46

47 All participants were identified using the hospital's EPIC Electronic Health Care System. Given the  
48 widespread imposed quarantine, lockdown, and social distancing measures, eligible participants were  
49 contacted, by our research assistant, over the phone in the listed order generated from EPIC until the  
50 targeted sample size was achieved. Our choice of recruitment method was to best accommodate the  
51 current COVID-19 health situation while still obtaining a representative sample. Given the noticeable  
52  
53  
54  
55  
56  
57  
58  
59  
60

1  
2  
3 decline in the number of patients physically presenting to clinics, we anticipated a major selection bias in  
4 administering our questionnaire in paper form instead. In addition, it would have limited the  
5 representativeness of our targeted population apart from violating recommended health care measures  
6 designed to limit COVID-19 disease spread. Similarly, choosing an online survey format would have  
7 failed to include women of low socioeconomic status and lower educational background who have limited  
8 online network access especially with Lebanon's economic crisis.<sup>18,19</sup> The study was designed to  
9 maximize reach and amass the perspective of as many respondents as possible. Therefore, it was devised  
10 utilizing telehealth to minimize in-person interactions. This is in accordance with the American Society  
11 for Reproductive medicine (ASRM) Patient Management and Clinical Recommendations during the  
12 Coronavirus (COVID-19) Pandemic published on March 17, 2020.  
13  
14  
15  
16  
17  
18  
19  
20  
21  
22  
23  
24

### 25 **Study Tool and validation**

26  
27 A questionnaire was developed for this current study to assess our target population's knowledge and  
28 attitudes towards COVID-19 (supplementary file). Items of the questionnaire were developed based on  
29 previous knowledge and attitudes questionnaires on ZIKA<sup>20</sup> and SARS virus<sup>21</sup> and according to  
30 guidelines published for the community on COVID-19 by the major scientific societies during the study  
31 period: Centers for Disease Control and Prevention (CDC),<sup>22</sup> ASRM,<sup>23</sup> European Society of Human  
32 Reproduction and Embryology (ESHRE),<sup>23</sup> and Royal College of Obstetrics and Gynecology (RCOG).<sup>24</sup>  
33  
34  
35  
36  
37  
38  
39  
40  
41 The questionnaire was divided into four main portions. The first section of the questionnaire gathered  
42 information on the woman's socio-demographic characteristics including age, area of residence,  
43 socioeconomic status/income level, educational attainment, parity, fertility status (pregnant with  
44 corresponding gestational age at the time of recruitment versus seeking fertility treatment for primary or  
45 secondary infertility). The second section included the respondent's self-rated perceived level of COVID-  
46 19 knowledge scored from 0 (not knowledgeable) to 10 (extremely knowledgeable) and primary source of  
47 attained knowledge (social media/community including family and friends or governmental and scientific  
48 authorities). This section also assessed participant's knowledge of COVID-19 using 28 items on clinical  
49  
50  
51  
52  
53  
54  
55  
56  
57  
58  
59  
60

1  
2  
3 symptoms, mode of transmission, diagnosis, control, and prevention. The third section consisted of 10-  
4 items assessing the participant's pregnancy-specific COVID-19 knowledge (maternal morbidity, neonatal  
5 morbidity, delivery modes, and breastfeeding). The fourth section assessed the participant's attitudes  
6 towards COVID-19 infection during pregnancy using a five-point Likert scale. Respondents indicated  
7 their level of agreement on each of six statements using "1 strongly disagree", "2 disagree", "3  
8 neutral/undecided", "4 agree", or "5 strongly agree". Participants who answered 4 or 5 were categorized  
9 as agreeing for subsequent correlation of attitudes with the level of knowledge.  
10  
11

12  
13  
14  
15  
16  
17  
18 The questionnaire was initially drafted in English then translated into Arabic and back to English by  
19 different authors to ensure the meaning of the content is comprehended. We then conducted a preliminary  
20 phase of testing our questionnaire for validity and reliability on a pilot of 15 participants who were  
21 excluded from the final analysis. The results showed adequate internal consistency reliability with a  
22 Cronbach alpha of 0.71.  
23  
24  
25  
26  
27  
28

### 29 30 **Ethical approval:**

31 This study was designed and coordinated in accordance with ethical principles regarding research  
32 involving human participants. Therefore, ethical approval of American University of Beirut Institutional  
33 Review Board (IRB) approval was secured prior to conducting the study including a waiver for written  
34 informed consent amended by oral/telephone consent. All participants' responses were anonymous with  
35 no identifiable data collected.  
36  
37  
38  
39  
40  
41  
42

### 43 **Patient and public involvement:**

44 Patients and/or the public were not involved in the design, conduct, reporting, or dissemination plans for  
45 this research.  
46  
47  
48  
49

### 50 **Sampling**

51  
52 There are currently no registries in Lebanon estimating the number of reproductive age women whether  
53 pregnant or seeking fertility treatment. Also, in the absence of similar studies related to coronavirus  
54  
55  
56  
57  
58  
59  
60

1  
2  
3 disease in women of the reproductive age group, our calculations of the sample size assumed that the  
4 probability of good knowledge on COVID-19 is 50 %.<sup>25</sup> As such, a minimum of 384 participants are  
5 needed to have a representative sample. This is calculated using a margin of error of 5% and an assumed  
6 probability of 0.5 designed to obtain the maximum sample size. Accordingly, recruitment was halted after  
7 a total of 402 respondents.  
8  
9  
10  
11  
12

### 13 14 **Statistical Analysis**

15  
16  
17 Descriptive statistical analyses were performed to summarize data on socio-demographic factors. reported  
18 for categorical variables as frequency (n) and percentage (%).

19  
20  
21 Two composite COVID-19 knowledge scores were calculated, general and pregnancy-specific COVID-  
22 19 knowledge scores. The COVID-19 general knowledge score was calculated for each participant based  
23 on 28 general COVID-19 knowledge items on the questionnaire. Similarly, a pregnancy-specific  
24 knowledge score was calculated based on 10 items regarding COVID-19 infection during pregnancy.  
25  
26 Knowledge questions were given one point for each correct response and zero points for each incorrect  
27 response. The median values for the cumulative general knowledge score and pregnancy-specific  
28 knowledge score were used as a cut-off to assess the difference in the extent of knowledge (poor versus  
29 good knowledge) and correlate it with sociodemographic characteristics, self-rated perception, and  
30 attitudes using Pearson chi-square test or Fisher's exact test. A participant's self-rated extent of  
31 knowledge was dichotomized to low perception (values of 0 to 6 inclusive) versus high perception (values  
32 7 to 10 inclusive) to facilitate analysis.  
33  
34  
35  
36  
37  
38  
39  
40  
41  
42  
43

44 All data analyses were performed using SPSS 26 statistical software package (IBM, USA). A P-value of  
45 < 0.05 was considered statistically significant.  
46  
47  
48  
49

### 50 **Results**

51  
52  
53 A total of 402 women completed the questionnaire with an average of  $30.69 \pm 4.88$  years of age, 46% of  
54 which lived in the capital Beirut. The socio-demographic characteristics of the participants are  
55  
56  
57  
58  
59  
60

1  
2  
3 summarized in table 1. Almost two-thirds of our sample were pregnant women with a comparable  
4 representation for each trimester of pregnancy. The majority of the sample (91.8%) had a college degree  
5 or higher educational attainment. The respondents were grouped according to their reported household's  
6 monthly income in dollars, converted from Lebanese pounds based on Lebanon's official exchange rate  
7 for uniformity in light of Lebanon's economic crisis and the labile market exchange rates. Almost a third  
8 of the sample earned approximately the minimum monthly wage, a third had a monthly household income  
9 between 1000-2000\$, while remaining participants reported income above 2000\$.

10  
11 All participants reported being knowledgeable about COVID-19, 70 % of which rated their knowledge as  
12 7 or more on a numerical scale of 0 to 10, 0 representing no knowledge at all. General COVID-19  
13 knowledge score ranged between a minimum of 14 and a maximum of 27, with an average score of 22.15  
14 (SD 2.44) and a median score of 22. Table 2 shows responses to the general COVID-19 knowledge  
15 questions. The most frequently identified symptom of COVID-19 infection was fever (99.5%) followed  
16 by shortness of breath (96.5%) and cough (95%). Sputum production and rhinorrhea were erroneously  
17 missed as possible symptoms by 71.1% and 57.5% of the respondents. The majority of participants  
18 correctly identified COVID-19 mode of transmission, prevention, and availability of approved treatment  
19 and vaccination at the time of questionnaire administration. All participants deemed personal hygiene,  
20 social distancing, and the use of face masks as ideal measurements to limit disease spread reinforcing  
21 their knowledge of COVID-19 epidemiology.

22  
23 Tables 3 and 4 summarize responses to pregnancy-specific knowledge questions and attitudes regarding  
24 management strategies of COVID-19 infection during pregnancy and post-partum. Pregnancy-specific  
25 knowledge ranged from a minimum of zero to a maximum of 10 with an average score of 6.84 (SD 2.061)  
26 and a median score of 7. The percentage of correct responses on each of the pregnancy-specific items of  
27 coronavirus disease in relation to pregnancy varied between 39.9% to 89.8%. About a third of the  
28 participants agreed that cesarean delivery should be performed to avoid vertical transmission of the virus  
29 and 40% to avoid exposure of health care workers to the virus. The majority showed positive attitudes to

1  
2  
3 breastfeeding if there is no risk of viral transmission through breastmilk (78.3%) and negative attitudes  
4 towards breastfeeding in light of possible respiratory transmission during lactation. 75.1% of women  
5 agreed on the importance of telehealth for follow-up during the COVID-19 pandemic. All respondents  
6 agreed that they needed more information specifically on COVID-19 infection during pregnancy.  
7  
8  
9

10  
11  
12 Although there was no significant difference in the extent of general COVID-19 knowledge among  
13 pregnant women versus women seeking pregnancy, pregnant women had a greater extent of knowledge  
14 regarding COVID-19 infection during pregnancy (Table 5). The extent of general and pregnancy-specific  
15 COVID-19 knowledge was noted to be higher among women with higher reported monthly income. In  
16 addition, women with good pregnancy-specific knowledge had significantly higher positive attitudes  
17 towards measures related to COVID-19 infection during pregnancy and lactation (Table 6).  
18  
19  
20  
21  
22  
23  
24  
25

## 26 **Discussion**

27  
28  
29 The novel coronavirus disease has become a global health emergency threatening not only health care  
30 systems but the political, economic, and social stability of countries globally. It is noteworthy that none of  
31 the respondents in our study reported total ignorance about COVID-19. All our sample conveyed being  
32 knowledgeable about COVID-19 with an average accuracy rate of general COVID knowledge about 79%  
33 (22/28 \*100). These results are not surprising given the majority had high educational attainments.  
34  
35 Moreover, this serves as an attestation of the collaborative governmental and communal efforts to spread  
36 awareness and control the spread of the disease. Since the confirmation of the first COVID-19 case in  
37 Lebanon on February 21, 2020, extraordinary measures have been put in action to control the spread of  
38 the disease. Campaigns were intensified to promote awareness on the transmission, symptoms, diagnosis,  
39 and prevention of this emerging illness whether through social media platforms, television ads,  
40 documentaries, brochures, or flyers posted in public. The Ministry of Health prudently monitored disease  
41 spread and updated their recommendations in accordance with WHO guidelines to deal with this  
42 outbreak<sup>26</sup>. These measures included reinforcement of lockdown practices including suspension of  
43  
44  
45  
46  
47  
48  
49  
50  
51  
52  
53  
54  
55  
56  
57  
58  
59  
60



1  
2  
3 internal and external flights, withholding gatherings, emphasizing online teaching in schools and  
4  
5 universities, and abiding by strict nationwide curfews.  
6

7  
8 Available evidence stresses the importance of knowledge as a key element in tackling disease  
9  
10 outbreaks.<sup>27,28</sup> Despite data from our sample indicative of a high degree of COVID-19 general knowledge,  
11  
12 the rise in the number of COVID-19 cases in Lebanon<sup>29</sup> might deceptively undermine the power of this  
13  
14 knowledge and efficiency of public health measures in dictating the public behavioral practices. Yet,  
15  
16 special circumstances in Lebanon should be contemplated as contributory to the spread of COVID-19  
17  
18 despite the extent of general COVID-19 knowledge. Lebanon has been a crisis-stricken nation before the  
19  
20 first confirmed COVID-19 case in the country. The economic crisis which preceded COVID-19 has led to  
21  
22 mass business closures and a drastic drop in Gross Domestic Product (GDP) with a substantial increase in  
23  
24 poverty.<sup>30,31</sup> This headed the premature uplifting of the lockdown measures with the subsequent increase  
25  
26 in COVID-19 spread. Add to that the crowded refugee conditions with already deranged limited health  
27  
28 capacity<sup>32</sup> and of course the capital's port blast which only added insult to injury.<sup>33,34</sup>  
29  
30

31  
32 General COVID-19 knowledge scores were more impressive in our population compared to the  
33  
34 pregnancy-specific COVID-19 knowledge. The least general knowledge score was 50% of correct  
35  
36 responses compared to 0% least pregnancy-specific knowledge score. This is also manifested in a lower  
37  
38 pregnancy-specific average and median knowledge score (table 3). Such findings are partly a reflection of  
39  
40 the role of information technology and the data made available during COVID-19 awareness campaigns.  
41  
42 While efforts focused on spreading awareness among the general population regarding COVID-19  
43  
44 transmission, symptoms, and preventive measures, governmental and public health measures had only  
45  
46 modest emphasis on vulnerable populations particularly pregnant women and women desirous of  
47  
48 conception. Therefore, we can fairly presume that accessibility to data on COVID-19 infection during  
49  
50 pregnancy was mainly through scientific platforms. As such, restricting this peculiar knowledge mainly to  
51  
52 women of higher educational background and socioeconomic status (table 5). Moreover, acquisition of  
53  
54 such knowledge is tricky being highly contingent on regularly updated scientific resources. This is  
55  
56  
57  
58  
59  
60

1  
2  
3 especially challenging given the uncertainty of the impact of COVID-19 during pregnancy with more data  
4  
5 unraveling with the spread of the disease.  
6

7  
8 Based on available evidence on COVID-19 infection during pregnancy and lactation, our data  
9  
10 demonstrated more positive attitudes among women with higher pregnancy-specific knowledge. This  
11  
12 essentially stresses the importance of spreading awareness and evidence-based knowledge adapted to the  
13  
14 needs of the masses. This is particularly crucial as part of vaccine campaigns. Our data point the  
15  
16 importance of tailoring platforms to educate reproductive age women on the essence and safety of  
17  
18 available COVID-19 vaccines.  
19

20  
21 To the researcher's knowledge, this is the first study to explore knowledge and attitudes toward COVID-  
22  
23 19 among the Lebanese population, particularly reproductive age women pregnant or seeking fertility  
24  
25 treatments. One limitation of our study is that the data used is self-reported with inherent reporting bias.  
26  
27 Furthermore, identification of patients via the hospital's electronic health care system restricted the  
28  
29 sampled population to women who have presented for care at least once during the COVID-19 pandemic  
30  
31 which is limited by convenience during lockdown measures. This is essentially reflected by a larger  
32  
33 representation of women from Beirut Governorate, over 90% of which had a college degree or higher  
34  
35 educational attainment, limiting the generalizability of our results. However, the nature of this study in  
36  
37 light of COVID-19 social constraints precludes acquisition of such data otherwise. Moreover, the value of  
38  
39 our findings to promote COVID-19 awareness among reproductive age women pregnant and/or desirous  
40  
41 of conception is expected to be amplified among women of lower socioeconomic status, educational  
42  
43 background, and/or from rural areas.  
44  
45

## 46 47 48 **Conclusion** 49

50  
51 This study suggests a deficiency in pregnancy-specific COVID-19 knowledge indicating the need for  
52  
53 targeted public health education interventions addressed to this vulnerable population. Though our data  
54  
55 comes almost a year since the first documented COVID-19 case in Lebanon and does not address  
56  
57

1  
2  
3 causation, it aims through its findings to bridge deficiencies in public health interventions and promote  
4 awareness-raising among reproductive age women pregnant and/or desirous of conception which might  
5 be instrumental to the success of COVID-19 vaccination and consequently the eradication of Covid-19  
6 pandemic. Over a year has elapsed since the onset of the COVID-19 pandemic and we are not yet corona-  
7 free. As such, this paper stresses the importance of tailoring our health education programs to promote  
8 knowledge needed to best overcome what we hope will one day become a part of our history. If we want  
9 to reach a solution, the public knowledge including that of vulnerable populations, attitudes and practices  
10 should be in alignment. This is best accomplished by raising awareness and being self-responsible.  
11  
12  
13  
14  
15  
16  
17  
18  
19  
20

### 21 **Author's contributions:**

22  
23 LE contributed to the main design of the study, development of research questions, analysis, data  
24 interpretation, manuscript drafting, and final amendments of the manuscript. CB contributed to the  
25 development of research questions, data collection, and interpretation. HT contributed to study design,  
26 data analysis, and interpretation. GG was responsible for overseeing the full development of the study  
27 design and data collection, data analysis and interpretation, development, and final sign-off of the  
28 manuscript. All authors reviewed and approved the final version of the manuscript.  
29  
30  
31  
32  
33  
34  
35  
36

### 37 **Declaration of Competing Interests:**

38  
39 The authors declare that they have no conflict of interest.  
40  
41

### 42 **Data availability statement:**

43  
44 Data are available upon reasonable request. Data may be made available by contacting the corresponding  
45 author.  
46  
47

### 48 **Ethical approval:**

49  
50 This study was reviewed and approved by the institutional review board of the American University of  
51 Beirut, Beirut, Lebanon (approval number SBS-2020-0167, approval date April,22,2020).  
52  
53  
54  
55  
56  
57  
58  
59  
60

### Acknowledgements:

The authors would like to thank Dr. Fadi El-Jardali for his critical revision of this manuscript and Ms. Maha Makki for her input on data analysis.

**Funding:** This research did not receive any specific grant from funding agencies in the public, commercial, or not-for-profit sectors.

### References:

- 1- Organization WH. WHO Director-General's remarks at the media briefing on 2019-nCoV on 11 February 2020, 2020.
- 2- Organization WH. WHO Director-General's opening remarks at the media briefing on COVID-19-11 March 2020: Geneva, Switzerland, 2020.
- 3- Shigemura J, Ursano RJ, Morganstein JC, et al. Public responses to the novel 2019 coronavirus (2019-nCoV) in Japan: Mental health consequences and target populations. *Psychiatry and clinical neurosciences* 2020;74(4):281.
- 4- Gorbalenya AE, Baker SC, Baric R, et al. Severe acute respiratory syndrome-related coronavirus: The species and its viruses—a statement of the Coronavirus Study Group. 2020
- 5- Zhou P, Yang X-L, Wang X-G, et al. A pneumonia outbreak associated with a new coronavirus of probable bat origin. *nature* 2020;579(7798):270-73.
- 6- Borges do Nascimento IJ, Cacic N, Abdulazeem HM, et al. Novel coronavirus infection (COVID-19) in humans: a scoping review and meta-analysis. *Journal of clinical medicine* 2020;9(4):941.
- 7- Riou J, Althaus CL. Pattern of early human-to-human transmission of Wuhan 2019 novel coronavirus (2019-nCoV), December 2019 to January 2020. *Eurosurveillance* 2020;25(4):2000058.
- 8- Van Doremalen N, Bushmaker T, Morris DH, et al. Aerosol and surface stability of SARS-CoV-2 as compared with SARS-CoV-1. *New England journal of medicine* 2020;382(16):1564-67.

- 1  
2  
3 9- Gerna G, Passarani N, Battaglia M, et al. Human enteric coronaviruses: antigenic relatedness to  
4 human coronavirus OC43 and possible etiologic role in viral gastroenteritis. *Journal of Infectious*  
5 *Diseases* 1985;151(5):796-803.  
6  
7  
8  
9  
10 10- Tang A, Tong Z-d, Wang H-l, et al. Detection of novel coronavirus by RT-PCR in stool specimen  
11 from asymptomatic child, China. *Emerging infectious diseases* 2020;26(6):1337.  
12  
13  
14 11- Wang W, Xu Y, Gao R, et al. Detection of SARS-CoV-2 in different types of clinical specimens.  
15 *Jama* 2020;323(18):1843-44.  
16  
17  
18 12- Organization WH. Report of the WHO-China joint mission on coronavirus disease 2019  
19 (COVID-19). 2020  
20  
21  
22 13- Chen W, Lan Y, Yuan X, et al. Detectable 2019-nCoV viral RNA in blood is a strong indicator  
23 for the further clinical severity. *Emerging microbes & infections* 2020;9(1):469-73.  
24  
25  
26 14- Hoehl S, Rabenau H, Berger A, et al. Evidence of SARS-CoV-2 infection in returning travelers  
27 from Wuhan, China. *New England Journal of Medicine* 2020;382(13):1278-80.  
28  
29  
30 15- Huynh G, Nguyen TNH, Vo KN, et al. Knowledge and attitude toward COVID-19 among  
31 healthcare workers at District 2 Hospital, Ho Chi Minh City. *Asian Pacific Journal of Tropical*  
32 *Medicine* 2020;13(6):260.  
33  
34  
35  
36 16- Al-Hanawi MK, Angawi K, Alshareef N, et al. Knowledge, attitude and practice toward COVID-  
37 19 among the public in the Kingdom of Saudi Arabia: a cross-sectional study. *Frontiers in public*  
38 *health* 2020;8:217.  
39  
40  
41  
42  
43 17- Abdelhafiz AS, Mohammed Z, Ibrahim ME, et al. Knowledge, perceptions, and attitude of  
44 Egyptians towards the novel coronavirus disease (COVID-19). *Journal of community health*  
45 *2020;45(5):881-90.*  
46  
47  
48  
49 18- The Lebanese telecommunication sector and the impact of privatization on the labor market;  
50 2001. Economic Research Forum for the Arab Countries, Iran & Turkey.  
51  
52  
53  
54 19- Bank W. Lebanon Sinking into One of the Most Severe Global Crises Episodes, Amidst  
55 Deliberate Inaction. 2021  
56  
57  
58  
59  
60

- 1  
2  
3 20- Harapan H, Rajamoorthy Y, Utomo PS, et al. Knowledge and attitude towards pregnancy-related  
4 issues of Zika virus infection among general practitioners in Indonesia. *BMC infectious diseases*  
5 2019;19(1):1-12.  
6  
7  
8  
9 21- Bener A, Al-Khal A. Knowledge, attitude and practice towards SARS. *The journal of the Royal*  
10 *Society for the Promotion of Health* 2004;124(4):167-70.  
11  
12  
13 22- Garcia M, Lipskiy N, Tyson J, et al. Centers for Disease Control and Prevention 2019 novel  
14 coronavirus disease (COVID-19) information management: addressing national health-care and  
15 public health needs for standardized data definitions and codified vocabulary for data exchange.  
16 *Journal of the American Medical Informatics Association* 2020;27(9):1476-87.  
17  
18  
19  
20 23- Rodriguez-Wallberg KA, Wikander I. A global recommendation for restrictive provision of  
21 fertility treatments during the COVID-19 pandemic. *Acta obstetricia et gynecologica*  
22 *Scandinavica* 2020;99(5):569.  
23  
24  
25  
26  
27 24- Ortiz EI, Herrera E, De La Torre A. Coronavirus (COVID 19) infection in pregnancy. *Colombia*  
28 *Médica* 2020;51(2)  
29  
30  
31  
32 25- Lemeshow S, Hosmer DW, Klar J, et al. Adequacy of sample size in health studies: Chichester:  
33 Wiley 1990.  
34  
35  
36 26- Lebanese Government, Ministry of Public Health. <https://www.moph.gov.lb/>.  
37  
38  
39 27- Goldstone BJ, Brown B. The role of public knowledge, resources, and innovation in responding  
40 to the Ebola outbreak. *Disaster medicine and public health preparedness* 2015;9(5):595-97.  
41  
42  
43 28- El-Jardali F, Bou-Karroum L, Fadlallah R. Amplifying the role of knowledge translation  
44 platforms in the COVID-19 pandemic response. *Health Research Policy and Systems* 2020;18:1-  
45 7.  
46  
47  
48  
49 29- Organization WH. Coronavirus disease ( COVID-19): weekly epidemiological update. 2020  
50  
51 30- Bizri AR, Khachfe HH, Fares MY, et al. COVID-19 pandemic: an insult over injury for Lebanon.  
52 *Journal of Community Health* 2021;46(3):487-93.  
53  
54  
55  
56  
57  
58  
59

- 1  
2  
3 31- Khoury P, Azar E, Hitti E. COVID-19 response in Lebanon: current experience and challenges in  
4 a low-resource setting. *Jama* 2020;324(6):548-49.  
5  
6  
7 32- Diwan I, Abi-Rached JM. Lebanon: managing Covid-19 in the time of revolution. *Arab Reform*  
8  
9 2020  
10  
11 33- Abouzeid M, Habib RR, Jabbour S, et al. Lebanon's humanitarian crisis escalates after the Beirut  
12  
13 blast. *The Lancet* 2020;396(10260):1380-82.  
14  
15  
16 34- El Sayed MJ. Beirut Ammonium Nitrate Explosion: A Man-Made Disaster in Times of the  
17  
18 COVID-19 Pandemic. *Disaster medicine and public health preparedness* 2020:1-5.  
19  
20  
21  
22  
23  
24  
25  
26  
27  
28  
29  
30  
31  
32  
33  
34  
35  
36  
37  
38  
39  
40  
41  
42  
43  
44  
45  
46  
47  
48  
49  
50  
51  
52  
53  
54  
55  
56  
57  
58  
59  
60

**Table 1: Socio-demographic characteristics of participants**

| <b>Socio-demographic characteristic</b> | <b>Number of women</b> | <b>Percentage</b> |
|-----------------------------------------|------------------------|-------------------|
| Age, years                              |                        |                   |
| 20-30                                   | 210                    | 52.2              |
| 31-39                                   | 169                    | 42                |
| ≥40                                     | 23                     | 5.7               |
| Participant                             |                        |                   |
| Pregnant                                | 263                    | 65.4              |
| Seeking pregnancy                       | 139                    | 34.6              |
| Parity                                  |                        |                   |
| Nulliparous                             | 245                    | 60.9              |
| Parous                                  | 151                    | 37.6              |
| Trimester of Pregnancy                  |                        |                   |
| First trimester                         | 77                     | 29.3              |
| Second trimester                        | 89                     | 33.8              |
| Third trimester                         | 97                     | 36.9              |
| Education                               |                        |                   |
| High school or below                    | 31                     | 7.7               |
| College/university degree               | 222                    | 55.2              |
| Post-graduate degree                    | 147                    | 36.6              |
| Monthly income                          |                        |                   |
| Less than \$1000                        | 117                    | 29.1              |
| Between \$1000-\$2000                   | 130                    | 32.3              |
| Between \$2000-\$3000                   | 50                     | 12.4              |
| More than \$3000                        | 77                     | 19.2              |
| Primary source of knowledge             |                        |                   |
| Media/Social media/Internet             | 193                    | 48.0              |
| MoPH/WHO/CDC/Hospital                   | 194                    | 48.3              |



Table 2: Responses to general knowledge questions about COVID-19 among participants

| Knowledge items                                                                                    | Correct response<br>N (%) | Incorrect response<br>N (%) |
|----------------------------------------------------------------------------------------------------|---------------------------|-----------------------------|
| <b>Symptoms include</b>                                                                            |                           |                             |
| Fever                                                                                              | 400 (99.5)                | 2 (0.5)                     |
| Dry Cough                                                                                          | 382 (95)                  | 20 (5)                      |
| Wet cough/sputum production                                                                        | 112 (27.9)                | 286 (71.1)                  |
| Shortness of breath/difficulty breathing                                                           | 388 (96.5)                | 14 (3.5)                    |
| Fatigue                                                                                            | 356 (88.6)                | 46 (11.4)                   |
| Myalgia                                                                                            | 257 (63.9)                | 143 (35.6)                  |
| Rhinorrhea                                                                                         | 167 (41.5)                | 231 (57.5)                  |
| Sore throat                                                                                        | 298 (74.1)                | 102 (25.4)                  |
| Chest pain                                                                                         | 293 (72.9)                | 103 (25.6)                  |
| Loss of taste/decreased appetite                                                                   | 217 (54)                  | 179 (44.5)                  |
| Primary COVID-19 transmission mode is contact with infected surfaces                               | 112 (27.9)                | 284 (70.6)                  |
| Primary COVID-19 transmission mode is respiratory droplets                                         | 378 (94)                  | 21 (5.2)                    |
| All positive COVID-19 patients are symptomatic                                                     | 377 (93.8)                | 23 (5.7)                    |
| All COVID-19 patients have upper respiratory symptoms                                              | 323 (80.3)                | 76 (18.9)                   |
| COVID-19 is preventable                                                                            | 380 (94.5)                | 20(5)                       |
| COVID-19 is highly infectious                                                                      | 387 (96.3)                | 14 (3.5)                    |
| COVID-19 is less infectious/contagious than flu                                                    | 341 (84.8)                | 56 (13.9)                   |
| COVID-19 has high mortality than flu                                                               | 196 (48.8)                | 191 (47.5)                  |
| There is no need to repeat COVID-19 testing if negative in symptomatic patients                    | 340 (84.6)                | 58 (14.4)                   |
| COVID-19 infection spread can be reduced by education/spreading awareness                          | 402 (100)                 | 0                           |
| COVID-19 can spread by close person to person contact                                              | 399 (99.3)                | 3 (0.7)                     |
| COVID -19 can be cured                                                                             | 383 (95.3)                | 19 (4.7)                    |
| Approved treatment for COVID-19 is available                                                       | 389 (96.8)                | 12 (3)                      |
| Approved Vaccination against COVID-19 virus is available                                           | 397 (98.8)                | 1 (0.2)                     |
| Best approach to decrease viral spread is personal hygiene, social distancing and use of face mask | 402 (100)                 | 0                           |
| Incubation period/period between infection & onset of symptoms                                     | 341 (84.8)                | 61 (15.2)                   |
| Duration of viral shedding                                                                         | 117 (29.1)                | 266 (66.2)                  |
| Symptomatic patients with negative COVID-19 testing should self-quarantine for 14 days             | 370 (92)                  | 27 (6.7)                    |
| <b>General Knowledge score</b>                                                                     |                           |                             |
| Min-Max                                                                                            | 14-27                     |                             |
| Mean $\pm$ SD                                                                                      | 22.15 $\pm$ 2.44          |                             |
| Median- IQR                                                                                        | 22-3                      |                             |
| Poor general knowledge score                                                                       | 195 (48.5%)               |                             |
| Good general knowledge score                                                                       | 207 (51.5%)               |                             |

**Table 3: Responses to pregnancy-specific knowledge questions about COVID-19 among participants**

| Knowledge items                                                                                                                 | Correct response<br>N (%) | Incorrect response<br>N (%) |
|---------------------------------------------------------------------------------------------------------------------------------|---------------------------|-----------------------------|
| Pregnant women have similar risk of being infected like non-pregnant women                                                      | 292 (72.6)                | 108 (26.9)                  |
| Pregnant COVID-19 positive women have increased maternal morbidity                                                              | 160 (39.8)                | 231 (57.5)                  |
| Coronavirus infected mothers are at higher risk of miscarriage                                                                  | 250 (62.2)                | 142 (35.3)                  |
| Coronavirus infected mothers are at higher risk of preterm delivery                                                             | 186 (46.3)                | 200 (49.8)                  |
| Pregnant women infected with COVID-19 late in pregnancy have been shown to transmit the virus to the fetus through the placenta | 303 (75.4)                | 82 (20.4)                   |
| Pregnant women infected with COVID-19 late in pregnancy have been shown to transmit the virus to the fetus during delivery      | 265 (65.9)                | 118 (29.4)                  |
| Only delivery mode for COVID-19 ladies is via cesarean delivery                                                                 | 256 (63.7)                | 131 (32.6)                  |
| Virus was shown to transmit through breastmilk                                                                                  | 324 (80.6)                | 62 (15.4)                   |
| COVID-19 infection during pregnancy was shown to cause congenital birth defects                                                 | 361 (89.8)                | 31 (7.7)                    |
| Maternal and neonatal risks of COVID-19 infection during pregnancy are not completely known                                     | 353 (87.8)                | 40 (10)                     |
| <b>Pregnancy-specific knowledge score</b>                                                                                       |                           |                             |
| Min-Max                                                                                                                         | 0-10                      |                             |
| Mean $\pm$ SD                                                                                                                   | 6.84 $\pm$ 2.061          |                             |
| Median- IQR                                                                                                                     | 7-2                       |                             |
| <b>Poor pregnancy-specific knowledge score</b>                                                                                  | 242 (60.2%)               |                             |
| <b>Good pregnancy-specific knowledge score</b>                                                                                  | 160 (39.8%)               |                             |

**Table 4: Responses to attitude statements regarding pregnancy measures during COVID-19 pandemic**

|                                                                                                                                                                      | <b>Strongly disagree<br/>n(%)</b> | <b>Disagree<br/>n(%)</b> | <b>Neutral<br/>n(%)</b> | <b>Agree<br/>n(%)</b> |
|----------------------------------------------------------------------------------------------------------------------------------------------------------------------|-----------------------------------|--------------------------|-------------------------|-----------------------|
| 10<br>11<br>12<br>13<br>14<br>15<br>16<br>17<br>18<br>19<br>20<br>21<br>22<br>23                                                                                     | 35 (8.7)                          | 152(37.8)                | 80 (19.9)               | 97 (24.1)             |
| 24<br>25<br>26<br>27<br>28<br>29<br>30<br>31<br>32<br>33<br>34<br>35<br>36<br>37<br>38<br>39<br>40<br>41<br>42<br>43<br>44<br>45<br>46<br>47<br>48<br>49<br>50<br>51 | 28 (7)                            | 140 (34.8)               | 68 (16.9)               | 127 (31.3)            |
| 52<br>53<br>54                                                                                                                                                       | 35 (8.7)                          | 161 (40)                 | 51 (12.7)               | 112 (27.5)            |
| 55<br>56<br>57<br>58<br>59<br>60                                                                                                                                     | 13 (3.2)                          | 53 (13.2)                | 19 (4.7)                | 138 (34.1)            |
|                                                                                                                                                                      | 110 (27.4)                        | 139 (34.6)               | 30 (7.5)                | 82 (20.4)             |
|                                                                                                                                                                      | 7 (1.7)                           | 46 (11.4)                | 40 (10)                 | 165 (41.4)            |

**Table 5: Association between COVID-19 general knowledge score versus pregnancy-specific COVID-19 knowledge and sociodemographic characteristics**

|  |                        |  |                                           |  |
|--|------------------------|--|-------------------------------------------|--|
|  | <b>Knowledge score</b> |  | <b>Pregnancy-specific Knowledge score</b> |  |
|--|------------------------|--|-------------------------------------------|--|

|                                      | <b>Poor general COVID-19 knowledge<br/>N=195</b> | <b>Good general COVID-19 knowledge<br/>N=207</b> | <b>p-value</b> | <b>Poor pregnancy-specific COVID-19 knowledge<br/>N=242</b> | <b>Good pregnancy-specific COVID-19 knowledge<br/>N=160</b> | <b>p-value</b> |
|--------------------------------------|--------------------------------------------------|--------------------------------------------------|----------------|-------------------------------------------------------------|-------------------------------------------------------------|----------------|
| <b>Age, years</b>                    |                                                  |                                                  |                |                                                             |                                                             |                |
| 20-30                                | 114 (55.1)                                       | 96 (49.2)                                        | 0.358          | 128 (52.9)                                                  | 82 (51.3)                                                   | 0.539          |
| 31-39                                | 80 (38.6)                                        | 89 (45.6)                                        |                | 98 (40.5)                                                   | 71 (44.4)                                                   |                |
| 40-45                                | 13 (6.3)                                         | 10 (5.1)                                         |                | 16 (6.6)                                                    | 7 (4.4)                                                     |                |
| <b>Gestational age</b>               |                                                  |                                                  |                |                                                             |                                                             |                |
| First trimester                      | 32 (24.8)                                        | 45 (33.6)                                        | 0.127          | 39 (27.3)                                                   | 38 (31.7)                                                   | 0.338          |
| Second trimester                     | 42 (32.6)                                        | 47 (35.1)                                        |                | 54 (37.8)                                                   | 35 (29.2)                                                   |                |
| Third trimester                      | 55 (42.6)                                        | 42 (31.3)                                        |                | 50 (35)                                                     | 47 (39.2)                                                   |                |
| <b>Parity</b>                        |                                                  |                                                  |                |                                                             |                                                             |                |
| Nulliparous                          | 129 (63.2)                                       | 116 (60.4)                                       | 0.564          | 154 (64.4)                                                  | 91 (58)                                                     | 0.195          |
| Parous                               | 75 (36.8)                                        | 76 (39.6)                                        |                | 85 (35.6)                                                   | 66 (42)                                                     |                |
| <b>Participant</b>                   |                                                  |                                                  |                |                                                             |                                                             |                |
| Pregnant                             | 130 (62.8)                                       | 133 (68.2)                                       | 0.255          | 144 (59.5)                                                  | 119 (74.4)                                                  | 0.002*         |
| Seeking pregnancy                    | 77 (37.2)                                        | 62 (31.8)                                        |                | 98 (40.5)                                                   | 41 (25.6)                                                   |                |
| <b>Education</b>                     |                                                  |                                                  |                |                                                             |                                                             |                |
| Primary/high school                  | 15 (7.3%)                                        | 16 (8.2)                                         | 0.887          | 23 (9.5)                                                    | 8 (5)                                                       | 0.026*         |
| College                              | 116 (56.6)                                       | 106 (54.4)                                       |                | 141 (58.5)                                                  | 81 (50.9)                                                   |                |
| Higher education                     | 74 (36.1)                                        | 73 (37.4)                                        |                | 77 (32)                                                     | 70 (44)                                                     |                |
| <b>Monthly income</b>                |                                                  |                                                  |                |                                                             |                                                             |                |
| Less than \$1000                     | 71 (36.2)                                        | 46 (25.8)                                        | 0.008*         | 83 (36.6)                                                   | 34 (23.1)                                                   | 0.025*         |
| Between \$1000-2000                  | 70 (35.7)                                        | 60 (33.7)                                        |                | 72 (31.7)                                                   | 58 (39.5)                                                   |                |
| Between \$2000- 3000                 | 16 (8.2)                                         | 34 (19.1)                                        |                | 32 (14.1)                                                   | 18 (12.2)                                                   |                |
| More than \$3000                     | 39 (19.9)                                        | 38 (21.3)                                        |                | 40 (17.6)                                                   | 37 (25.2)                                                   |                |
| <b>Type of infertility</b>           |                                                  |                                                  |                |                                                             |                                                             |                |
| Primary                              | 49 (79)                                          | 35 (76.1)                                        | 0.716          | 56 (72.7)                                                   | 28 (90.3)                                                   | 0.047*         |
| Secondary                            | 13 (21)                                          | 11 (23.9)                                        |                | 21 (27.3)                                                   | 3 (9.7)                                                     |                |
| <b>Self-rated level of knowledge</b> |                                                  |                                                  |                |                                                             |                                                             |                |
| Low perception                       | 53 (26.1)                                        | 60 (31.4)                                        | 0.245          | 65 (27.7)                                                   | 48 (30.2)                                                   | 0.586          |
| High perception                      | 150 (73.9)                                       | 131 (68.6)                                       |                | 170 (72.3)                                                  | 111 (69.8)                                                  |                |
| <b>Source of knowledge</b>           |                                                  |                                                  |                |                                                             |                                                             |                |
| Community/Media                      | 106 (52.7)                                       | 87 (46.8)                                        | 0.241          | 115 (49.8)                                                  | 78 (50)                                                     | 0.967          |
| MoPH/WHO/CDC/<br>Hospital            | 95 (47.3)                                        | 99 (53.2)                                        |                | 116 (50.2)                                                  | 78 (50)                                                     |                |

Data presented as n (%).

\*Significant p-value<0.05

**Table 6: Association between pregnancy-specific COVID-19 knowledge score and positive attitudes towards COVID-19 dilemmas**

|                                                                                                                                                                | Pregnancy-specific Knowledge score                  |                                                     | p-value |
|----------------------------------------------------------------------------------------------------------------------------------------------------------------|-----------------------------------------------------|-----------------------------------------------------|---------|
|                                                                                                                                                                | Poor pregnancy-specific COVID-19 knowledge<br>N=242 | Good pregnancy-specific COVID-19 knowledge<br>N=160 |         |
| <b>Pregnant woman with positive COVID-19 infection should undergo cesarean section to prevent fetal intra-uterine infection</b>                                | 102 (42.1)                                          | 31 (19.4)                                           | <0.001* |
| <b>Pregnant woman with positive COVID-19 infection should undergo cesarean section to decrease exposure of health care workers to the virus</b>                | 108 (45.2)                                          | 55 (34.4)                                           | 0.031*  |
| <b>Routine COVID-19 screening during pregnancy is needed</b>                                                                                                   | 100 (41.7)                                          | 53 (33.1)                                           | 0.085   |
| <b>If you were told the virus does not spread to the infant through breast milk of an infected COVID-19 positive mother, you would breastfeed</b>              | 178 (74.2)                                          | 137 (85.6)                                          | 0.006*  |
| <b>If you were told, the virus can spread while breastfeeding through respiratory droplets and contact with COVID-19 infected mother, you would breastfeed</b> | 67 (28.2)                                           | 52 (32.5)                                           | 0.353   |
| <b>Telehealth is essential due to the current situation</b>                                                                                                    | 100 (41.3)                                          | 130 (81.3)                                          | <0.001* |

Data presented as n (%).

\*Significant p-value<0.05

**Part 1: Sociodemographic Information**

|                                                                                                                                                                                                                                                                                                   |                                                                                                                                                                                |                                                                                                                            |                                                                                                                                                               |
|---------------------------------------------------------------------------------------------------------------------------------------------------------------------------------------------------------------------------------------------------------------------------------------------------|--------------------------------------------------------------------------------------------------------------------------------------------------------------------------------|----------------------------------------------------------------------------------------------------------------------------|---------------------------------------------------------------------------------------------------------------------------------------------------------------|
| Age: ----- (years)                                                                                                                                                                                                                                                                                | Educational level:<br><input type="radio"/> Illiterate<br><input type="radio"/> Primary/High school<br><input type="radio"/> College<br><input type="radio"/> Higher education | Occupation:<br>-----                                                                                                       | Monthly income:<br><input type="radio"/> < 1000\$<br><input type="radio"/> 1000-2000\$<br><input type="radio"/> 2000-3000\$<br><input type="radio"/> > 3000\$ |
| Nationality:<br><input type="radio"/> Lebanese<br><input type="radio"/> Non-Lebanese                                                                                                                                                                                                              |                                                                                                                                                                                |                                                                                                                            |                                                                                                                                                               |
| Place of residency:<br><input type="radio"/> Beirut<br><input type="radio"/> North<br><input type="radio"/> Mount Lebanon<br><input type="radio"/> Akkar<br><input type="radio"/> South<br><input type="radio"/> Beqaa<br><input type="radio"/> Nabatieh<br><input type="radio"/> Baalbeck/Hermel | Do you consider yourself knowledgeable about COVID-19?<br><input type="radio"/> Yes<br><input type="radio"/> No                                                                | How well do you rate your knowledge about Coronavirus COVID-19 on a scale from 1 to 10?<br><br><b>1 2 3 4 5 6 7 8 9 10</b> | What are your sources of knowledge?<br><br>-----                                                                                                              |

**Part 2: General knowledge about the disease, level of awareness, precautions**

What are the earliest symptoms of COVID-19? -----

| <b>Knowledge of signs and symptoms:</b>     | <b>Yes</b> | <b>No</b> |
|---------------------------------------------|------------|-----------|
| Fever                                       |            |           |
| Dry cough                                   |            |           |
| Shortness of breath or difficulty breathing |            |           |
| Fatigue                                     |            |           |
| Aches/myalgias                              |            |           |
| Runny nose                                  |            |           |
| Sore throat                                 |            |           |
| Persistent pain or pressure in the chest    |            |           |
| Sputum production                           |            |           |
| Anorexia/ decreased appetite                |            |           |

|                                                                                 | <b>Yes</b> | <b>No</b> |
|---------------------------------------------------------------------------------|------------|-----------|
| Primary COVID-19 transmission mode is contact with infected surfaces            |            |           |
| Primary COVID-19 transmission mode is respiratory droplets                      |            |           |
| All positive COVID-19 patients are symptomatic                                  |            |           |
| All COVID-19 patients have upper respiratory symptoms                           |            |           |
| COVID-19 is preventable?                                                        |            |           |
| COVID-19 is less infectious/contagious than flu                                 |            |           |
| COVID-19 has 10-15 times mortality rate of flu                                  |            |           |
| There is no need to repeat COVID-19 testing if negative in symptomatic patients |            |           |
| COVID-19 infection spread can be reduced by education/spreading awareness       |            |           |
| COVID-19 can spread by close person to person contact                           |            |           |

|   |                                                                                  |  |  |
|---|----------------------------------------------------------------------------------|--|--|
| 1 | COVID-19 is highly infectious                                                    |  |  |
| 2 | COVID -19 can be cured                                                           |  |  |
| 3 | Approved treatment for COVID-19 is available                                     |  |  |
| 4 | Vaccination for COVID-19 is available                                            |  |  |
| 5 | Best approach to decrease viral spread is personal hygiene and social distancing |  |  |

|    |                                                                             |          |           |           |           |           |
|----|-----------------------------------------------------------------------------|----------|-----------|-----------|-----------|-----------|
| 9  | <b>Days</b>                                                                 | <b>7</b> | <b>14</b> | <b>21</b> | <b>28</b> | <b>37</b> |
| 10 | Incubation period/period between infection & onset of symptoms can be up to |          |           |           |           |           |
| 11 | Duration of viral shedding can be up to                                     |          |           |           |           |           |

|    |                                                                                         |            |           |
|----|-----------------------------------------------------------------------------------------|------------|-----------|
| 14 |                                                                                         | <b>Yes</b> | <b>No</b> |
| 15 | Symptomatic patients with negative COVID-19 testing should self-quarantine for 14 days? |            |           |

### Part 3: COVID-19 in pregnancy/transmission/neonatal effects/delivery mode/breastfeeding

|    |                                                                                                                                 |            |           |
|----|---------------------------------------------------------------------------------------------------------------------------------|------------|-----------|
| 24 |                                                                                                                                 | <b>Yes</b> | <b>No</b> |
| 25 | Pregnant women have similar risk of being infected like non-pregnant women                                                      |            |           |
| 26 | Pregnant COVID-19 positive women have increased maternal morbidity                                                              |            |           |
| 27 | Coronavirus infected mothers are at higher risk of miscarriage                                                                  |            |           |
| 28 | Coronavirus infected mothers are at higher risk of preterm delivery                                                             |            |           |
| 29 | Pregnant women infected with COVID-19 late in pregnancy have been shown to transmit the virus to the fetus through the placenta |            |           |
| 30 | Pregnant women infected with COVID-19 late in pregnancy have been shown to transmit the virus to the fetus during delivery      |            |           |
| 31 | Only delivery mode for COVID-19 ladies is via cesarean delivery                                                                 |            |           |
| 32 | Virus was shown to transmit through breastmilk                                                                                  |            |           |
| 33 | COVID-19 infection during pregnancy was shown to cause congenital birth defects                                                 |            |           |
| 34 | Maternal and neonatal risks of COVID-19 infection during pregnancy are not completely known                                     |            |           |

### Part 4: Attitudes towards COVID-19 in pregnant ladies

|    |                                                                                                                                                         |                          |                 |                |              |                       |
|----|---------------------------------------------------------------------------------------------------------------------------------------------------------|--------------------------|-----------------|----------------|--------------|-----------------------|
| 45 |                                                                                                                                                         | <b>Strongly disagree</b> | <b>Disagree</b> | <b>Neutral</b> | <b>Agree</b> | <b>Strongly agree</b> |
| 46 | Do you think a pregnant woman with positive COVID-19 infection should undergo cesarean section to prevent fetal intra-uterine infection                 |                          |                 |                |              |                       |
| 47 | Do you think a pregnant woman with positive COVID-19 infection should undergo cesarean section to decrease exposure of health care workers to the virus |                          |                 |                |              |                       |
| 48 | Do you think you need routine COVID-19 screening during pregnancy                                                                                       |                          |                 |                |              |                       |
| 49 | If you were told the virus does not spread to the infant                                                                                                |                          |                 |                |              |                       |

1  
2  
3  
4  
5  
6  
7  
8  
9  
10  
11  
12  
13  
14  
15  
16  
17  
18  
19  
20  
21  
22  
23  
24  
25  
26  
27  
28  
29  
30  
31  
32  
33  
34  
35  
36  
37  
38  
39  
40  
41  
42  
43  
44  
45  
46  
47  
48  
49  
50  
51  
52  
53  
54  
55  
56  
57  
58  
59  
60

|                                                                                                                                                         |  |  |  |  |  |
|---------------------------------------------------------------------------------------------------------------------------------------------------------|--|--|--|--|--|
| through breast milk of an infected COVID-19 positive mother, would you breastfeed                                                                       |  |  |  |  |  |
| If you were told, the virus can spread while breastfeeding through respiratory droplets and contact with COVID-19 infected mother, would you breastfeed |  |  |  |  |  |
| Telehealth is essential due to the current situation                                                                                                    |  |  |  |  |  |

For peer review only



STROBE Statement—Checklist of items that should be included in reports of *cross-sectional studies*

|                              | Item No | Recommendation                                                                                                                                                                                               | Page No         |
|------------------------------|---------|--------------------------------------------------------------------------------------------------------------------------------------------------------------------------------------------------------------|-----------------|
| <b>Title and abstract</b>    | 1       | (a) Indicate the study's design with a commonly used term in the title or the abstract                                                                                                                       | 1,2             |
|                              |         | (b) Provide in the abstract an informative and balanced summary of what was done and what was found                                                                                                          | 2               |
| <b>Introduction</b>          |         |                                                                                                                                                                                                              |                 |
| Background/rationale         | 2       | Explain the scientific background and rationale for the investigation being reported                                                                                                                         | 3,4             |
| Objectives                   | 3       | State specific objectives, including any prespecified hypotheses                                                                                                                                             | 5               |
| <b>Methods</b>               |         |                                                                                                                                                                                                              |                 |
| Study design                 | 4       | Present key elements of study design early in the paper                                                                                                                                                      | 5,6             |
| Setting                      | 5       | Describe the setting, locations, and relevant dates, including periods of recruitment, exposure, follow-up, and data collection                                                                              | 5               |
| Participants                 | 6       | (a) Give the eligibility criteria, and the sources and methods of selection of participants                                                                                                                  | 5               |
| Variables                    | 7       | Clearly define all outcomes, exposures, predictors, potential confounders, and effect modifiers. Give diagnostic criteria, if applicable                                                                     | 6               |
| Data sources/<br>measurement | 8*      | For each variable of interest, give sources of data and details of methods of assessment (measurement). Describe comparability of assessment methods if there is more than one group                         | 6               |
| Bias                         | 9       | Describe any efforts to address potential sources of bias                                                                                                                                                    | 6               |
| Study size                   | 10      | Explain how the study size was arrived at                                                                                                                                                                    | 7,8             |
| Quantitative variables       | 11      | Explain how quantitative variables were handled in the analyses. If applicable, describe which groupings were chosen and why                                                                                 | 8               |
| Statistical methods          | 12      | (a) Describe all statistical methods, including those used to control for confounding                                                                                                                        | 8               |
|                              |         | (b) Describe any methods used to examine subgroups and interactions                                                                                                                                          | 8               |
|                              |         | (c) Explain how missing data were addressed                                                                                                                                                                  | 8               |
|                              |         | (d) If applicable, describe analytical methods taking account of sampling strategy                                                                                                                           | 8               |
|                              |         | (e) Describe any sensitivity analyses                                                                                                                                                                        | 8               |
| <b>Results</b>               |         |                                                                                                                                                                                                              |                 |
| Participants                 | 13*     | (a) Report numbers of individuals at each stage of study—eg numbers potentially eligible, examined for eligibility, confirmed eligible, included in the study, completing follow-up, and analysed            | 8               |
|                              |         | (b) Give reasons for non-participation at each stage                                                                                                                                                         | NA              |
|                              |         | (c) Consider use of a flow diagram                                                                                                                                                                           | NA              |
| Descriptive data             | 14*     | (a) Give characteristics of study participants (eg demographic, clinical, social) and information on exposures and potential confounders                                                                     | 9               |
|                              |         | (b) Indicate number of participants with missing data for each variable of interest                                                                                                                          | Shown in tables |
| Outcome data                 | 15*     | Report numbers of outcome events or summary measures                                                                                                                                                         | 9               |
| Main results                 | 16      | (a) Give unadjusted estimates and, if applicable, confounder-adjusted estimates and their precision (eg, 95% confidence interval). Make clear which confounders were adjusted for and why they were included | 9, tables       |

|                          |    |                                                                                                                                                                            |        |
|--------------------------|----|----------------------------------------------------------------------------------------------------------------------------------------------------------------------------|--------|
|                          |    | (b) Report category boundaries when continuous variables were categorized                                                                                                  | Tables |
|                          |    | (c) If relevant, consider translating estimates of relative risk into absolute risk for a meaningful time period                                                           | NA     |
| Other analyses           | 17 | Report other analyses done—eg analyses of subgroups and interactions, and sensitivity analyses                                                                             | NA     |
| <b>Discussion</b>        |    |                                                                                                                                                                            |        |
| Key results              | 18 | Summarise key results with reference to study objectives                                                                                                                   | 10,11  |
| Limitations              | 19 | Discuss limitations of the study, taking into account sources of potential bias or imprecision. Discuss both direction and magnitude of any potential bias                 |        |
| Interpretation           | 20 | Give a cautious overall interpretation of results considering objectives, limitations, multiplicity of analyses, results from similar studies, and other relevant evidence | 12     |
| Generalisability         | 21 | Discuss the generalisability (external validity) of the study results                                                                                                      | 12     |
| <b>Other information</b> |    |                                                                                                                                                                            |        |
| Funding                  | 22 | Give the source of funding and the role of the funders for the present study and, if applicable, for the original study on which the present article is based              | NA     |

\*Give information separately for exposed and unexposed groups.

**Note:** An Explanation and Elaboration article discusses each checklist item and gives methodological background and published examples of transparent reporting. The STROBE checklist is best used in conjunction with this article (freely available on the Web sites of PLoS Medicine at <http://www.plosmedicine.org/>, Annals of Internal Medicine at <http://www.annals.org/>, and Epidemiology at <http://www.epidem.com/>). Information on the STROBE Initiative is available at [www.strobe-statement.org](http://www.strobe-statement.org).
