# Supplementary material for: Knowledge and attitudes among Lebanese pregnant women and women seeking fertility treatment during the COVID-19 outbreak: a cross-sectional survey
Source: PubMed Central journal article supplement — BMJ Open. 2022 Mar 16;12(3):e057873. doi: 10.1136/bmjopen-2021-057873 (PMC8927896; doi:10.1136/bmjopen-2021-057873), 2022-03-16
Supplement: bmjopen-2021-057873supp001.pdf [file bmjopen-2021-057873supp001.pdf]

**Part 1: Sociodemographic Information**

|                                                                                                                                                                                                                                                                                                          |                                                                                                                                                                                       |                                                                                                                               |                                                                                                                                                                      |
|----------------------------------------------------------------------------------------------------------------------------------------------------------------------------------------------------------------------------------------------------------------------------------------------------------|---------------------------------------------------------------------------------------------------------------------------------------------------------------------------------------|-------------------------------------------------------------------------------------------------------------------------------|----------------------------------------------------------------------------------------------------------------------------------------------------------------------|
| Age: ----- (years)                                                                                                                                                                                                                                                                                       | <b>Educational level:</b><br><input type="radio"/> Illiterate<br><input type="radio"/> Primary/High school<br><input type="radio"/> College<br><input type="radio"/> Higher education | <b>Occupation:</b><br>-----                                                                                                   | <b>Monthly income:</b><br><input type="radio"/> < 1000\$<br><input type="radio"/> 1000-2000\$<br><input type="radio"/> 2000-3000\$<br><input type="radio"/> > 3000\$ |
| <b>Nationality:</b><br><input type="radio"/> Lebanese<br><input type="radio"/> Non-Lebanese                                                                                                                                                                                                              |                                                                                                                                                                                       |                                                                                                                               |                                                                                                                                                                      |
| <b>Place of residency:</b><br><input type="radio"/> Beirut<br><input type="radio"/> North<br><input type="radio"/> Mount Lebanon<br><input type="radio"/> Akkar<br><input type="radio"/> South<br><input type="radio"/> Beqaa<br><input type="radio"/> Nabatieh<br><input type="radio"/> Baalbeck/Hermel | <b>Do you consider yourself knowledgeable about COVID-19?</b><br><input type="radio"/> Yes<br><input type="radio"/> No                                                                | <b>How well do you rate your knowledge about Coronavirus COVID-19 on a scale from 1 to 10?</b><br><b>1 2 3 4 5 6 7 8 9 10</b> | <b>What are your sources of knowledge?</b><br>-----                                                                                                                  |

**Part 2: General knowledge about the disease, level of awareness, precautions**

What are the earliest symptoms of COVID-19? -----

| <b>Knowledge of signs and symptoms:</b>     | <b>Yes</b> | <b>No</b> |
|---------------------------------------------|------------|-----------|
| Fever                                       |            |           |
| Dry cough                                   |            |           |
| Shortness of breath or difficulty breathing |            |           |
| Fatigue                                     |            |           |
| Aches/myalgias                              |            |           |
| Runny nose                                  |            |           |
| Sore throat                                 |            |           |
| Persistent pain or pressure in the chest    |            |           |
| Sputum production                           |            |           |
| Anorexia/ decreased appetite                |            |           |

|                                                                                 | <b>Yes</b> | <b>No</b> |
|---------------------------------------------------------------------------------|------------|-----------|
| Primary COVID-19 transmission mode is contact with infected surfaces            |            |           |
| Primary COVID-19 transmission mode is respiratory droplets                      |            |           |
| All positive COVID-19 patients are symptomatic                                  |            |           |
| All COVID-19 patients have upper respiratory symptoms                           |            |           |
| COVID-19 is preventable?                                                        |            |           |
| COVID-19 is less infectious/contagious than flu                                 |            |           |
| COVID-19 has 10-15 times mortality rate of flu                                  |            |           |
| There is no need to repeat COVID-19 testing if negative in symptomatic patients |            |           |
| COVID-19 infection spread can be reduced by education/spreading awareness       |            |           |
| COVID-19 can spread by close person to person contact                           |            |           |

|                                                                                  |  |  |
|----------------------------------------------------------------------------------|--|--|
| COVID-19 is highly infectious                                                    |  |  |
| COVID -19 can be cured                                                           |  |  |
| Approved treatment for COVID-19 is available                                     |  |  |
| Vaccination for COVID-19 is available                                            |  |  |
| Best approach to decrease viral spread is personal hygiene and social distancing |  |  |

| <b>Days</b>                                                                 | <b>7</b> | <b>14</b> | <b>21</b> | <b>28</b> | <b>37</b> |
|-----------------------------------------------------------------------------|----------|-----------|-----------|-----------|-----------|
| Incubation period/period between infection & onset of symptoms can be up to |          |           |           |           |           |
| Duration of viral shedding can be up to                                     |          |           |           |           |           |

|                                                                                         | <b>Yes</b> | <b>No</b> |
|-----------------------------------------------------------------------------------------|------------|-----------|
| Symptomatic patients with negative COVID-19 testing should self-quarantine for 14 days? |            |           |

### Part 3: COVID-19 in pregnancy/transmission/neonatal effects/delivery mode/breastfeeding

|                                                                                                                                 | <b>Yes</b> | <b>No</b> |
|---------------------------------------------------------------------------------------------------------------------------------|------------|-----------|
| Pregnant women have similar risk of being infected like non-pregnant women                                                      |            |           |
| Pregnant COVID-19 positive women have increased maternal morbidity                                                              |            |           |
| Coronavirus infected mothers are at higher risk of miscarriage                                                                  |            |           |
| Coronavirus infected mothers are at higher risk of preterm delivery                                                             |            |           |
| Pregnant women infected with COVID-19 late in pregnancy have been shown to transmit the virus to the fetus through the placenta |            |           |
| Pregnant women infected with COVID-19 late in pregnancy have been shown to transmit the virus to the fetus during delivery      |            |           |
| Only delivery mode for COVID-19 ladies is via cesarean delivery                                                                 |            |           |
| Virus was shown to transmit through breastmilk                                                                                  |            |           |
| COVID-19 infection during pregnancy was shown to cause congenital birth defects                                                 |            |           |
| Maternal and neonatal risks of COVID-19 infection during pregnancy are not completely known                                     |            |           |

### Part 4: Attitudes towards COVID-19 in pregnant ladies

|                                                                                                                                                         | <b>Strongly disagree</b> | <b>Disagree</b> | <b>Neutral</b> | <b>Agree</b> | <b>Strongly agree</b> |
|---------------------------------------------------------------------------------------------------------------------------------------------------------|--------------------------|-----------------|----------------|--------------|-----------------------|
| Do you think a pregnant woman with positive COVID-19 infection should undergo cesarean section to prevent fetal intra-uterine infection                 |                          |                 |                |              |                       |
| Do you think a pregnant woman with positive COVID-19 infection should undergo cesarean section to decrease exposure of health care workers to the virus |                          |                 |                |              |                       |
| Do you think you need routine COVID-19 screening during pregnancy                                                                                       |                          |                 |                |              |                       |
| If you were told the virus does not spread to the infant                                                                                                |                          |                 |                |              |                       |

|                                                                                                                                                         |  |  |  |  |  |
|---------------------------------------------------------------------------------------------------------------------------------------------------------|--|--|--|--|--|
| through breast milk of an infected COVID-19 positive mother, would you breastfeed                                                                       |  |  |  |  |  |
| If you were told, the virus can spread while breastfeeding through respiratory droplets and contact with COVID-19 infected mother, would you breastfeed |  |  |  |  |  |
| Telehealth is essential due to the current situation                                                                                                    |  |  |  |  |  |
